# Supplementary material for: Lived experience of patients with Long COVID: a qualitative study in the UK
Source: PubMed Central journal article supplement — BMJ Open. 2023 Apr 26;13(4):e068481. doi: 10.1136/bmjopen-2022-068481 (PMC10151237; doi:10.1136/bmjopen-2022-068481), 2023-04-26
Supplement: bmjopen-2022-068481.draft_revisions.pdf [file bmjopen-2022-068481.draft_revisions.pdf]

# BMJ Open

BMJ Open is committed to open peer review. As part of this commitment we make the peer review history of every article we publish publicly available.

When an article is published we post the peer reviewers' comments and the authors' responses online. We also post the versions of the paper that were used during peer review. These are the versions that the peer review comments apply to.

The versions of the paper that follow are the versions that were submitted during the peer review process. They are not the versions of record or the final published versions. They should not be cited or distributed as the published version of this manuscript.

BMJ Open is an open access journal and the full, final, typeset and author-corrected version of record of the manuscript is available on our site with no access controls, subscription charges or pay-per-view fees (<http://bmjopen.bmj.com>).

If you have any questions on BMJ Open's open peer review process please email [info.bmjopen@bmj.com](mailto:info.bmjopen@bmj.com)

# BMJ Open

## Long COVID, the lived experience from a cohort observation in the United Kingdom through hand-written diaries.

|                               |                                                                                                                                                                                                                                                                                                                                                                      |
|-------------------------------|----------------------------------------------------------------------------------------------------------------------------------------------------------------------------------------------------------------------------------------------------------------------------------------------------------------------------------------------------------------------|
| Journal:                      | <i>BMJ Open</i>                                                                                                                                                                                                                                                                                                                                                      |
| Manuscript ID                 | bmjopen-2022-068481                                                                                                                                                                                                                                                                                                                                                  |
| Article Type:                 | Original research                                                                                                                                                                                                                                                                                                                                                    |
| Date Submitted by the Author: | 19-Sep-2022                                                                                                                                                                                                                                                                                                                                                          |
| Complete List of Authors:     | Thomas, Callum; University of Derby, College of Science and Engineering<br>Owen, Rebecca; University of Derby,<br>Yates, James; University of Derby<br>Ferraro, Francesco; University of Derby<br>Bewick, Tom; Burton NHS Foundation Trust<br>Haggan, Kate; Burton NHS Foundation Trust<br>Faghy, Mark; University of Derby,<br>Ashton, Ruth EM; University of Derby |
| Keywords:                     | COVID-19, PUBLIC HEALTH, Public health < INFECTIOUS DISEASES                                                                                                                                                                                                                                                                                                         |
|                               |                                                                                                                                                                                                                                                                                                                                                                      |

SCHOLARONE™  
Manuscripts

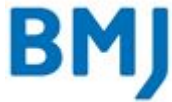

I, the Submitting Author has the right to grant and does grant on behalf of all authors of the Work (as defined in the below author licence), an exclusive licence and/or a non-exclusive licence for contributions from authors who are: i) UK Crown employees; ii) where BMJ has agreed a CC-BY licence shall apply, and/or iii) in accordance with the terms applicable for US Federal Government officers or employees acting as part of their official duties; on a worldwide, perpetual, irrevocable, royalty-free basis to BMJ Publishing Group Ltd ("BMJ") its licensees and where the relevant Journal is co-owned by BMJ to the co-owners of the Journal, to publish the Work in this journal and any other BMJ products and to exploit all rights, as set out in our [licence](#).

The Submitting Author accepts and understands that any supply made under these terms is made by BMJ to the Submitting Author unless you are acting as an employee on behalf of your employer or a postgraduate student of an affiliated institution which is paying any applicable article publishing charge ("APC") for Open Access articles. Where the Submitting Author wishes to make the Work available on an Open Access basis (and intends to pay the relevant APC), the terms of reuse of such Open Access shall be governed by a Creative Commons licence – details of these licences and which [Creative Commons](#) licence will apply to this Work are set out in our licence referred to above.

Other than as permitted in any relevant BMJ Author's Self Archiving Policies, I confirm this Work has not been accepted for publication elsewhere, is not being considered for publication elsewhere and does not duplicate material already published. I confirm all authors consent to publication of this Work and authorise the granting of this licence.

1  
2  
3 1 **Title:** Long COVID, the lived experience from a cohort observation in the United Kingdom  
4 through hand-written diaries.  
5  
6

7  
8 3 **Authors:** Callum Thomas<sup>1</sup>, Rebecca Owen<sup>1</sup>, James Yates<sup>1</sup>, Francesco V Ferraro<sup>1</sup>, Tom  
9 4 Bewick<sup>2</sup>, Kate Haggan<sup>2</sup>, Mark A Faghy<sup>1,3</sup>, Ruth E Ashton<sup>1</sup>.  
10  
11

12 5 **Affiliations:**  
13

14  
15 6 1. School of Human Sciences, University of Derby, Derby, UK  
16

17  
18 7 2. Respiratory Medicine, University Hospitals of Derby and Burton NHS Foundation  
19 8 Trust, Derby, UK  
20

21  
22 9 3. Healthy Living for Pandemic Event Protection (HL – PIVOT) Network, Chicago, IL  
23  
24

25 10 **Corresponding Author:** Dr Mark Faghy, Human Sciences Research Centre, University of  
26 11 Derby, England, UK. E: M.Faghy@Derby.ac.uk., T: +44(0)1332592109  
27  
28

29 12 **Key Words:** Lived experience, COVID-19, Long COVID, Health and Wellbeing  
30  
31  
32  
33  
34  
35  
36  
37  
38  
39  
40  
41  
42  
43  
44  
45  
46  
47  
48  
49  
50  
51  
52  
53  
54  
55  
56  
57  
58  
59  
60

1  
2  
3 **1 ABSTRACT**  
4

5  
6 *Background:* Long COVID is a rapidly evolving global health crisis requiring interdisciplinary  
7 support strategies that incorporate the lived experience of patients. Currently, there is a paucity  
8 of research documenting the day-to-day experiences of patients living with Long COVID.  
9

10  
11 *Objective:* To explore the lived experience of Long COVID patients.  
12

13  
14 *Study design:* Longitudinal cohort observation.  
15

16  
17 *Setting:* An inductive, data-driven, qualitative approach was used to evaluate hand-written  
18 diaries obtained from individuals who had been referred to a Derbyshire Long COVID clinic.  
19

20  
21 *Participants:* 12 participants (11 females, age  $49 \pm 10$  years, 11 Caucasians) were recruited.  
22 Participants were included if they had confirmed or suspected COVID-19 infection, >18 years  
23 old, understood the study requirements and provided informed consent.  
24

25  
26 *Method:* Participants were directed to complete self-report diaries over 16 weeks. Responses  
27 were transcribed verbatim and analysed using thematic analysis.  
28

29  
30 *Results:* Three key themes were highlighted; (1) a need to further understand symptoms and  
31 symptom management, (2) the impact upon the quality of life and health status, and (3) the  
32 persistence and episodic nature of symptoms affecting physical, mental, and emotional  
33 wellbeing.  
34

35  
36  
37  
38 *Conclusions:* The novel challenges presented by Long COVID are complex with varying  
39 interrelated factors that are broadly impacting quality of life. In our quest to develop efficacious  
40 support mechanisms we must incorporate the lived experiences and foster true collaborations  
41 between health professionals, researchers, and service providers to improve patient quality of  
42 life.  
43

44  
45  
46  
47 *Future research:* Research must engage a representative demographic to ensure that support  
48 services are appropriate and accessible.  
49

50  
51 *Trial registration:* NCT04649957.  
52  
53  
54  
55  
56  
57  
58  
59  
60

## 1                   2                   3                   4                   5                   6                   7                   8                   9                   10                   11                   12                   13                   14                   15                   16                   17                   18                   19                   20                   21                   22                   23                   24                   25                   26                   27                   28                   29                   30                   31                   32                   33                   34                   35                   36                   37                   38                   39                   40                   41                   42                   43                   44                   45                   46                   47                   48                   49                   50                   51                   52                   53                   54                   55                   56                   57                   58                   59                   60

- 1                   2                   3                   4                   5                   6                   7                   8                   9                   10                   11                   12                   13                   14                   15                   16                   17                   18                   19                   20                   21                   22                   23                   24                   25                   26                   27                   28                   29                   30                   31                   32                   33                   34                   35                   36                   37                   38                   39                   40                   41                   42                   43                   44                   45                   46                   47                   48                   49                   50                   51                   52                   53                   54                   55                   56                   57                   58                   59                   60

## 8                   9                   10                   11                   12                   13                   14                   15                   16                   17                   18                   19                   20                   21                   22                   23                   24                   25                   26                   27                   28                   29                   30                   31                   32                   33                   34                   35                   36                   37                   38                   39                   40                   41                   42                   43                   44                   45                   46                   47                   48                   49                   50                   51                   52                   53                   54                   55                   56                   57                   58                   59                   60

9                   10                   11                   12                   13                   14                   15                   16                   17                   18                   19                   20                   21                   22                   23                   24                   25                   26                   27                   28                   29                   30                   31                   32                   33                   34                   35                   36                   37                   38                   39                   40                   41                   42                   43                   44                   45                   46                   47                   48                   49                   50                   51                   52                   53                   54                   55                   56                   57                   58                   59                   60

28                   29                   30                   31                   32                   33                   34                   35                   36                   37                   38                   39                   40                   41                   42                   43                   44                   45                   46                   47                   48                   49                   50                   51                   52                   53                   54                   55                   56                   57                   58                   59                   60

1  
2  
3 1 evidence of a widening health-inequalities gap[8, 10, 11]. The complex and episodic symptom  
4 2 profile is at the front of mechanistic investigations to increase pathological insight but the lived  
5 3 experience of patients has thus far received little attention[12]. The need to obtain a mechanistic  
6 4 understanding is unquestionable to inform the design and development of appropriate support  
7 5 services and pharmacological interventions that can address patient complaints. However, even  
8 6 in the wake of future treatment approaches, the longstanding impact on physical health and  
9 7 mental well-being will require comprehensive support mechanisms to restore pre-COVID-19  
10 8 functional status and QoL.

11 9 Although limited longitudinal investigations exist, reports of physical, cognitive, and  
12 10 psychosocial symptoms (i.e., fatigue, brain fog, and anxiety) that impact multiple physiological  
13 11 systems (i.e., cardiovascular, respiratory, and pulmonary system) are becoming well  
14 12 documented[13-15]. Davis et al.[13] identified three symptom clusters that have distinct  
15 13 temporal profiles, cluster 1 identified early symptoms that peak and then diminish (i.e., runny  
16 14 nose, loss of appetite, fever), cluster 2 represented stable symptoms (i.e., nausea, chest  
17 15 tightness, fatigue), meanwhile cluster 3 represented symptoms that initially increase sharply  
18 16 than either plateau or slightly increase or decrease over the following months (i.e., palpitations,  
19 17 brain fog, post-exertional malaise)[13]. Unpredictable symptom profiles could partly explain  
20 18 why individuals with Long COVID have struggled to access the support that is needed to help  
21 19 them manage/improve their condition.

22 20 Another aspect reported via an online survey of Long COVID is the episodic nature of  
23 21 symptoms[16] with 86% of participants (n= 3,252, 95% Confidence Interval (CI), 84.8% to  
24 22 87.0%) having symptoms triggered or exacerbated by physical or mental activities[13]. Despite  
25 23 a call for the lived experience to be key in the design and implementation within research[17],  
26 24 there is a lack of detail and studies that provide qualitative accounts of patients. Callan et al.[18]  
27 25 recognised the relapsing-remitting time course of Long COVID as an ‘episodic disability’  
28 26 whereby participants reported brain fog that aligned with the unpredictable wellness and illness  
29 27 previously described in HIV-positive patients. However, the focus groups were followed up  
30 28 4-6 months later by email and similarly provide a snapshot summary to that of online surveys.  
31 29 Witvliet[19] retrospectively revealed the details of her personal Long COVID journey which  
32 30 revealed nuanced details that would not be captured in clinical pathways. This detail could  
33 31 provide important insight to support clinical decision making but also in the development of  
34 32 Long COVID support pathways that are relevant, accepted and lead to improved patient  
35 33 outcomes.

1 Patient diaries have previously been used in intensive care units (ICU) and are useful tools to  
2 document patients' lived experiences[20, 21]. Diaries are flexible and adaptable tools that can  
3 be used anytime and away from face-to-face research and clinical settings[21] which can bridge  
4 the gap in communication between patients and healthcare providers[22]. However, the use of  
5 diaries in documenting the day-to-day lived experience of individuals with Long COVID is not  
6 commonplace and there is a paucity of data obtained that documents the lived experience which  
7 is important in the design and development of specific support mechanisms[17]. Accordingly,  
8 this study sought to capture the lived experience of individuals with Long COVID taking part  
9 in a 16-week cohort observation study collected via hand-written diaries.

## 10 **METHODS**

11 Following NHS research ethics approval (IRAS ID: 292920) and informed consent, qualitative  
12 accounts of the lived experience of 12 Long COVID participants (1 male, age  $49 \pm 10$  years)  
13 were recorded via diaries over 16 weeks. The diaries formed part of a larger cohort observation  
14 of individuals recovering in community settings from a COVID-19 infection. Participants were  
15 recruited following a referral from an established Long COVID clinic and directed to use the  
16 diaries freely to capture information that they deemed appropriate as part of their post-COVID-  
17 19 journey. This exploratory approach was appropriate given the lack of understanding of the  
18 lived Long COVID experiences, and a greater need to inform the development of bespoke  
19 support mechanisms.

### 20 **Researcher characteristics**

21 The researchers had bimonthly contact with participants, and this did influence diary entries,  
22 with multiple accounts of site visits and their impact upon symptoms. Researchers in contact  
23 with participants had not previously worked with hand-written diaries however given  
24 participants were instructed to use diaries freely, this should have had limited impact on how  
25 they were used.

### 26 **Patient and public involvement (PPI) statement**

27 PPI was a crucial part of the research design, implementation of the project and interpretation  
28 of the resulting data reported here. Participants were instructed to freely create their own data  
29 that was relevant to their lived experience of COVID-19. Participants were involved in raising  
30 awareness of our research to recruit participants in their Long COVID networks and will also



1 be involved in the dissemination of the results by sharing the findings with their support groups  
2 and networks.

### 3 **Data analysis**

4 Extracts were transcribed verbatim and coded using the qualitative software NVIVO 12 Pro  
5 (Version 12.7, QSR International, Doncaster, Australia). An inductive, data-driven approach  
6 was adopted to code the data into descriptive terms which were collated to produce 12 themes  
7 and 82 sub-themes. Themes and sub-themes were grouped to generate three overarching  
8 themes, (1) Understanding symptom management (2) QoL status and (3) Emotions. Theme  
9 coverage was also reported and denoted the percentage reporting of the theme across all the  
10 diaries. A sample of the data was shared with the trial steering group to check for accuracy and  
11 avoidance of interpretational bias.

## 12 **RESULTS**

13 Participant characteristics are detailed in Table 1 and are skewed in representation towards  
14 white, middle-aged females, and are consistent with research in this area[23].

**Table 1:** Pooled participant pre-COVID, baseline and 16-week post-baseline measures (Mean  $\pm$  SD).

|                              | Pre-COVID   | Baseline    | 16-weeks    | <i>P</i> values |
|------------------------------|-------------|-------------|-------------|-----------------|
| Overall health (AU)          | 2 $\pm$ 0.9 | 4 $\pm$ 0.6 | 3 $\pm$ 0.8 | < 0.001         |
| COVID-19 Symptom rating (AU) | -           | 8 $\pm$ 1   | 7 $\pm$ 2   | 0.324           |
| PCFS (AU)                    | -           | 3 $\pm$ 0.4 | 2 $\pm$ 0.8 | 0.054           |
| Dyspnoea (AU)                | -           | 3 $\pm$ 0.7 | 3 $\pm$ 0.8 | 1.000           |
| EQ5D-5L (AU)                 | -           | 13 $\pm$ 3  | 13 $\pm$ 5  | 0.575           |
| EQ5D-5L VAS (AU)             | -           | 46 $\pm$ 16 | 47 $\pm$ 22 | 0.691           |

Overall health score: 1-5 scale (1 = very good and 5 = very bad). COVID-19 Symptom score: 0–10 rating of symptom effect on daily life (0 = no impact / symptoms and 10 = symptom/s have had a big effect). PCFS: 0–4 scale of functional status (0 = no limitations and 4 = severe limitations). Dyspnoea: 1-5 scale of breathlessness (1 = breathless only with strenuous exercise and 5 = too breathless to leave the house). EQ5D-5L involves rating subcategories of mobility, self-care, usual activities, pain/discomfort, and anxiety/depression on a 1-5 scale (1 = no problems and 5 = extreme problems or inability). EQ5D-5L VAS: 0-100 scale of perceived overall health (0 = worst health they can imagine and 100 the best health they can imagine). Overall health data only for retrospective pre-COVID evaluation. AU, Arbitrary Unit, PCFS, Post COVID Functional Status, VAS, Visual Analogue Score. *P* values are derived from paired samples t-tests.

15

## 1 Theme 1: Understanding symptom management

2 Symptom management received 66% coverage with 2,089/2911 references made to Long  
3 COVID symptoms. Furthermore, the broad and cyclical nature of symptoms highlights the day-  
4 to-day challenges associated with COVID-19 recovery:

5 *“... headache (lighter), aches/ pains in muscles/ joints, pains/ aches in chest, shortness of*  
6 *breath, brain pulsating, light ringing in ears. Thought I'd put the alarm on and I hadn't,*  
7 *internal vibrations/pain in upper arms... kept losing focus in online training.”*

8 *“... went out for a meal with work for a couple of hours - felt good. Got home - symptoms*  
9 *returned intensely.”*

10 *“Pins and needles went yesterday evening. Arms feel wonderful again. No pins and needles*  
11 *in hand. Made such a difference to my mood today... Every day is a new day.”*

12 Nine out of the twelve diaries made references relating to the awareness and availability of  
13 healthcare support to help participants cope with the challenges of living with Long COVID.  
14 There were regular suggestions that the services were unhelpful, underdeveloped, and slow:

15 *“...neurology appointment came away disappointed and angry at lack of understanding...”*

16 *“Felt the doctor (as in GP) needs awareness raising more to Long COVID.”*

17 *“Chased Long COVID clinic been waiting since 25th June. Still, 2.5 months to wait at*  
18 *least!!”*

19 In response to frustration at a lack of services, participants reported opting to try self-treatment  
20 methods with mixed results. These include self-prescribed vitamin supplementation or changes  
21 to diet:

22 *“Can feel the benefits of B 12 – less fatigue.”*

23 *“Still feel antihistamines and low histamine diet do help.”*

24 Other instances highlight that these experimental treatments resulted in symptom exacerbation:

25 *“...went to... oxygen centre for an intense therapy trial. Had to stop procedure after 15*  
26 *minutes due to intensifying chest pain and blurred vision”*

1  
2  
3  
4 1 *“Oxygen therapy. extremely tired, confusion + brain”*

5  
6 2 Despite this frustration, there was recognition that care services to appropriately support their  
7  
8 3 needs are developing:

9  
10 4 *“Occupational therapist through LC clinic really supportive/ helpful.”*

11  
12  
13 5 *“Now seen CF [Chronic fatigue] clinic and improving pacing”*

14  
15 6 Furthermore, a doctor within an established Long COVID clinic was able to identify symptoms  
16  
17 7 associated with a pulmonary embolism and was able to make a referral for further examination.

18  
19  
20 8 *“Very good referrals to fatigue clinic, breathing clinic, vocational rehab, blood tests, eye*  
21  
22 9 *checks. Go to A&E for blood clot check.”*

23  
24 10 The role of the family as part of the lived experience was also repeatedly noted. However, akin  
25  
26 11 to healthcare support services, the data provided mixed findings. For example, some  
27  
28 12 participants were very dependent on family and the support provided was crucial to everyday  
29  
30 13 life and functional activity:

31  
32 14 *“In a lot of pain after the walk, not comfortable going out without my wife support.”*

33  
34  
35 15 *“Totally exhausted and hardly able to do anything, my husband is looking after me.”*

36  
37 16 The diaries also revealed that participants played an important role in supporting their families,  
38  
39 17 usually in the form of some sort of task or responsibility. Unsurprisingly, this served to  
40  
41 18 exacerbate symptoms and/or have negative outcomes:

42  
43 19 *“Saw son + his girlfriend so cooked lunch for them - was fab to see them but wiped me out -*  
44  
45 20 *everything ached and was shattered!!”*

46  
47  
48 21 *“Stayed at sons for night to look after his dogs, flooded kitchen, (forgot I'd left tap on).”*

49  
50  
51 22 **Theme 2: Quality of Life status**

52  
53 23 Symptoms were closely associated with QoL (29% coverage). This theme not only identified  
54  
55 24 the impact on functional status and ability of participants to be physically active but also the  
56  
57 25 numerous times they needed to recover and manage symptoms accordingly. Commonly  
58  
59 26 reported symptoms of tiredness, fatigue, and exhaustion were often managed with recovery  
60  
27 periods:

1  
2  
3 1 “...visit to see my Auntie. An exhausting day... genuine chest pain and tightness so sat  
4 2 down... my chest problems are worsening... exhausted so went upstairs straight away.”

5  
6  
7 3 “Went to a church service, walked but it was very slow, tiring and cause chest tightness.  
8 4 Went and lay on the bed all of the afternoon. Couldn't remember how long I slept.”

9  
10  
11  
12 5 Regardless of whether recovery was acute (i.e., a quick nap on the sofa) or prolonged (i.e.,  
13 6 resting all day in bed), symptoms were not consistently alleviated, and it was commonplace for  
14 7 symptoms to persist and often become exacerbated:

15  
16  
17 8 “Rested from 5pm - After a couple of hours symptoms intensified again. Had conversation  
18 9 with a friend and kept forgetting simple words.”

19  
20  
21  
22 10 “Rested all afternoon. Made tea / struggled to walk my dog. All symptoms intensified, unable  
23 11 to do anything else, pains in muscles/joints particularly fingers/hands, forearms and elbows.  
24 12 Light headedness.”

25  
26  
27  
28 13 Persistent symptomology also impacted routine functional activities that pre-COVID-19  
29 14 infection would have likely taken less time and energy to complete. This ranged from difficulty  
30 15 to concentrate during a task, as well as prolonging the length of time to complete that activity:

31  
32  
33 16 “...writing Christmas cards out of my mind. Completed them but it took three hours. It took  
34 17 me three times longer than before I had Long COVID. “

35  
36  
37  
38 18 “Took all day to Hoover and Polish”

39  
40  
41 19 The ability to exercise had also changed, with a few accounts of low volume cycling, or light  
42 20 cross-trainer or treadmill activities reported. In most instances, targeted exercise for  
43 21 participants was intolerable:

44  
45  
46 22 “The physios want me to continue the exercises at home but that is impossible for me to do.”

47  
48  
49 23 “Exercise but everything seems like one step forward and two steps [back]”

50  
51  
52 24 There was a determination from participants to engage in physical activities. Walking was  
53 25 frequently reported however was consistently linked with an exacerbation of symptoms:

54  
55  
56 26 “Try taking my dog for a walk... This was hard as my legs felt heavy and tired to move.”  
57  
58  
59  
60

1  
2  
3 1 *“Physios want me to continue the exercises at home but that is impossible for me to do. No*  
4  
5 2 *strength at all.”*  
6

7  
8 3 Return to work was affected by Long COVID symptoms and some participants did not feel  
9  
10 4 prepared to resume their careers due to the physical and mental challenges of work:

11  
12 5 *“I am signed off work... still feel I would be unable to return to work at present (feel*  
13  
14 6 *concerned whether I will ever be able to [return to] my job as a community nurse as it is a*  
15  
16 7 *mentally and physically demanding role).”*  
17

18 8 However, participants who returned to work described the experience as a “fight”, while having  
19  
20 9 to manage the challenges of their symptoms alongside the financial pressures of having had an  
21  
22 10 extensive period of leave from work:

23  
24 11 *“Having to fight for every step as well as being ill.”*  
25

26  
27 12 *“Grief from work - half pay without notice.”*  
28

29  
30 13 A key facet in all activities was the role of pacing. Participants were often keen to be functional  
31  
32 14 and active, and pacing strategies helped them manage these activities:

33  
34 15 *“Very tired this evening but know I would be so tea out the freezer. Getting better on these*  
35  
36 16 *days. I'm not superhuman. I can pace.”*  
37

38  
39 17 *“Very tiring week... paced myself each day.”*  
40

41 18 For some, advice was sought from other individuals recovering from COVID-19 infection.  
42  
43 19 Specifically, sharing of experiences helped participants pace and manage activities in their own  
44  
45 20 lives:

46  
47 21 *“Interesting interview on Lorraine with Nick Knowles TV presenter. after having COVID and*  
48  
49 22 *wanting to get back into shape he returned to the gym and found exercised knocked him back*  
50  
51 23 *with recovery. Quite interesting I think, since I've eased off with my morning gym sessions, I*  
52  
53 24 *think it may be helping my recovery?”*  
54

55 25 Another interesting finding was that participants could pace their activities feeling ok until they  
56  
57 26 stopped, thereafter symptoms were unbearable:

58  
59 27 *“Helped install CCTV system, wanted to do something normal [to] see how I got on. Lots of*  
60  
28 *breaks, pace myself, painkillers. Was OK until I stopped. Symptoms intensified immensely,*

1  
2  
3  
4  
5  
6  
7  
8  
9  
10  
11  
12  
13  
14  
15  
16  
17  
18  
19  
20  
21  
22  
23  
24  
25  
26  
27  
28  
29  
30  
31  
32  
33  
34  
35  
36  
37  
38  
39  
40  
41  
42  
43  
44  
45  
46  
47  
48  
49  
50  
51  
52  
53  
54  
55  
56  
57  
58  
59  
60

1 *nine out of 10”*

2 Therefore, it does seem that there is a limit of tolerance on the extent to which pacing can help  
3 during a particular activity, with education on the cumulative activity load across a time  
4 needing to be established:

5 *“Went to horse again and a walked at a steady pace with regular stops to get some fresh air.  
6 Left ear still blocked, whooshing and earache, left arm still weak and unable to lift for long  
7 without getting a cramping pain. Pain in feet and internal vibrations at night, still coughing  
8 phlegm up and a cough...”*

9 The symptom exacerbation following activities was widely reported, however, participants  
10 chose to still engage with certain activities despite knowing that symptoms would occur during  
11 or afterwards:

12 *“Went to a family wedding at 1:00pm. Very hard to make the effort but enjoyed seeing my  
13 nephew getting married. Had to leave early, was totally exhausted and went to bed at  
14 7:00pm.”*

15 *“Went to meet a friend for coffee, exhausted after and needed to rest.”*

16 Socialising did not always reap the preconceived benefits and, on some occasions, served to  
17 make participants feel worse. This did not just exacerbate physical symptoms, but also  
18 presented mental and emotionally difficulties:

19 *“Taken to coffee but taking part in 1960s quiz very physically and mentally exhausted...  
20 failed miserably at quiz due to total brain fog... Went to bed again in the afternoon feeling  
21 very frustrated...”*

### 22 **Theme 3: Emotions**

23 Another pillar on which our codes were structured was through the emotions and thoughts of  
24 our participants (5% coverage). A range of negative emotions accompanied changes in  
25 symptomology and functional capacity:

26 *“Came home and had a soak in the bath which took an hour to get over after getting out  
27 muscles and joints aching. By late afternoon muscles and joints nerve aching from head to  
28 toe... I was sobbing with the pain.”*

1  
2  
3 1 *“Had bad night sleep, feeling anxious + teary this morning. Feel unable to attend study*  
4  
5 2 *appointment due to feeling unwell so have rescheduled.”*  
6  
7

8 3 Emotions were accompanied with comparisons to healthy individuals around them which  
9  
10 4 frequently led to negative sentiments and feelings of despair:

11 5 *“Was taken to church in the morning followed by a fund-raising coffee morning for*  
12  
13 6 *Macmillan Cancer Research. It made me aware of how I am still physically and mentally*  
14  
15 7 *“disabled” due to how quickly other non-Long COVID people moved about.”*  
16

17  
18 8 *“Sitting on the side-lines watching everyone else live.”*  
19

20  
21 9 Furthermore, participants would also compare themselves to their pre-infection state...:

22  
23 10 *“Worried whether I will ever get back to pre Long COVID state.”*  
24

25  
26 11 *“Still ever present - the failing/knowledge that, without the sertraline, I would be in a little*  
27  
28 12 *ball of depression. When will this end. Will I ever get my life back.”*  
29

30  
31 13 ...with changes in identity and emotional sensitivity since infection also reported:

32  
33 14 *“I was made aware that I now have very little compassion or empathy- I'm not the same*  
34  
35 15 *person.”*  
36

37 16 *“I just know I'm not me anymore.”*  
38  
39

#### 40 17 **4. Theme undulation**

41  
42 18 An area that underpinned all themes was the undulating nature of the post-COVID-19 journey  
43  
44 19 and the interconnectivity of all themes. Participants often revealed that it was commonplace to  
45  
46 20 experience a period of improvement followed by worsening of symptoms, day-by-day in some  
47  
48 21 cases. However, this was often accompanied by comments regarding a correlated change in  
49  
50 22 their QoL status and emotional state:

51  
52 23 *“...sadly looks like another corner turned ☹. Energy levels even more. Craved carbs and*  
53  
54 24 *chocolate.”*  
55

56 25 *“Every day is a new day.”*  
57  
58  
59 26



## 1 DISCUSSION

2 To the best of our knowledge, this is the first study to provide a detailed qualitative account of  
3 the day-to-day experiences of individuals living with Long COVID. The data highlights three  
4 key themes relating to: (1) understanding symptom management and the presentation of a broad  
5 symptom profile, (2) the impact upon QoL, health status and the role of pacing in managing  
6 functional tasks, (3) turbulent and episodic symptom profiles with changes in physical, mental,  
7 and emotional status.

8 Arguably the biggest challenge associated with Long COVID is its broad symptom profile[15].  
9 Our work aligns with previous research that has identified the most prevalent symptom profiles  
10 associated with Long COVID[1, 13, 24, 25]. However, data here recognises the integration of  
11 the symptoms with factors such as QoL status, and comparisons with healthy others and  
12 previous self, rather than considering these in isolation. For many participants, symptoms were  
13 managed by rest or sleep, which impacts their ability to undertake activities of daily life (e.g.,  
14 completing the school run or engaging in social activities). It was reported that when  
15 participants did attempt activities that are deemed low intensity this would exacerbate  
16 symptoms and lead to an extended period of convalescence. Accordingly, attempting to live  
17 with Long COVID requires considered support mechanisms that aim to help individuals  
18 understand changes in their physical, mental, and emotional health which is in line with an  
19 episodic symptom profile that is prone to exacerbation. A further consideration is to understand  
20 the episodic nature of Long COVID. Participants here reported perceived improvements in  
21 symptom severity, often referring to '*turning a corner*', however, this could change  
22 instantaneously and without any provocation in some cases, a finding that has been recognised  
23 in other studies[13, 18, 19, 26]. It is well known that patients with chronic diseases will increase  
24 activities when they feel able but with little consideration of the consequences[27]. As such,  
25 further research is required to document changes in symptom profile relative to increased  
26 volume and intensity of activity.

27 Data here supports that of Davis et al.[13], who highlighted disparate recovery profiles that  
28 failed to reach a resolution 7 months post-infection, thus highlighting the individual nature and  
29 the need for tailored approaches[14]. The broad and complex symptom profile of Long COVID  
30 makes it hard for health workers, family and friends to fully understand the realities of living  
31 with a debilitating and unpredictable condition[16]. Our data extend this understanding by  
32 demonstrating that multiple stakeholders are often involved in the Long COVID journey, which  
33 is representative of the multidimensional and complex presentation of this condition. Boix et



1  
2  
3 1 al.[28] reported that many people with Long COVID have unfortunately struggled to have their  
4 2 condition recognised. Patients have therefore felt isolated and resulted to self-treatment  
5 3 methods given the lack of knowledge, understanding, and bespoke treatments available for  
6 4 their condition and, in some instances, this has served to deteriorate, rather than ameliorate,  
7 5 their health[29, 30].  
8  
9

10  
11  
12 6 Following critical illness such as a severe COVID-19 infection, it can be commonplace to  
13 7 experience a range of difficult emotions and periods of stress which can manifest in the form  
14 8 of feeling tearful, lack of appetite, and difficulty sleeping[31]. Houben-Wilke and  
15 9 colleagues[32] demonstrate that negative emotions (i.e., post-traumatic stress disorder, anxiety,  
16 10 and depression) persist in some Long COVID patients 3 and 6 months after the onset of  
17 11 COVID-19 symptoms, with a prevalence comparable between hospitalised and non-  
18 12 hospitalised patients. Our data indicates in a non-hospitalised cohort that these emotions are  
19 13 frequently borne out of symptomology, however, comparisons to healthy individuals and pre-  
20 14 infection states are centred at the heart of these thought processes. Houben-Wilke et al.[32]  
21 15 cited a lack of care and unmet needs as factors that contribute to negative emotions, however,  
22 16 future support services also need to consider helping Long COVID patients accept their new  
23 17 baseline health to avoid unhelpful comparisons. There is a need to further this understanding  
24 18 with more research concerning the clear need for physical, mental, and emotional support.  
25  
26  
27  
28  
29

30  
31  
32  
33  
34  
35 19 The body of research surrounding the treatment and management of Long COVID is of  
36 20 international interest, however, there is a need to develop bespoke, adaptive, flexible, and  
37 21 interdisciplinary resources to support individuals with Long COVID[33-35]. This is in keeping  
38 22 with one of our main findings which was the broad and undulating symptom profile reported  
39 23 by participants. Macpherson and colleagues[36] suggest services to support patients could take  
40 24 the form of 'one-stop' clinics in hospitals to treat patients holistically alongside established  
41 25 multidisciplinary departments. However, time to access support presented one of the biggest  
42 26 challenges to our participants, and if 'one-stop' clinics cannot support demand then patients  
43 27 may refer to potentially harmful self-treatment methods that will exacerbate symptoms.  
44 28 Therefore, whilst 'one-stop' multidisciplinary approaches offer a potential solution, the  
45 29 complex clinical presentation with patient settings may be better suited to a detailed and  
46 30 expansive service that is underpinned by a comprehensive screening process that directs  
47 31 patients to the required services which act in a 'buffet style system' where patients can access  
48 32 (in both volume and intensity) services they require to positively influence clinical outcomes.  
49  
50  
51  
52  
53  
54  
55  
56  
57  
58  
59  
60

1  
2  
3 1 Multidisciplinary collaboration has been suggested as an approach to provide Long COVID  
4 support[1, 11]. However, given the nature of multidisciplinary teams (i.e., lack of interaction  
5 2 and unison between members), it is postulated that this would have limited patient benefit[1].  
6 3  
7 4 Alternatively, Faghy and colleagues[1] suggest an interdisciplinary approach embedded in  
8 5 systems science may better help identify key stakeholders that can assist in the design, delivery  
9 6 and evaluation of support services. This will be vital given the prevalence of Long COVID[9]  
10 7 combined with a chronically under-resourced and understaffed NHS[37]. One group of  
11 8 stakeholders that may help ease this growing clinical burden are sports and exercise medical  
12 9 professionals whose expertise can help design and deliver holistic rehabilitative programmes.  
13 10 For example, these professionals could supervise patients' volume and intensity selection  
14 11 process for their directed activities, which importantly does not necessarily need to include  
15 12 physical activity (i.e., diaphragmatic/box breathing)[33, 35]. Furthermore, the resources of this  
16 13 sector (i.e., physiological laboratories as testing facilities) may also help ease the burden on  
17 14 primary healthcare settings. However, it is important the lived experience is incorporated into  
18 15 the entirety of the process to ensure the co-design and delivery of services address patient  
19 16 needs, are safe and are accepted by Long COVID patients[38]. For example, it is widely  
20 17 acknowledged that key triggers (physical, cognitive and emotional) can lead to provoke a  
21 18 relapse or worsening of symptoms[13], and this may explain why previous attempts to re-  
22 19 purpose existing clinical interventions for Long COVID services have not been accepted and  
23 20 in some cases have been damaging (i.e., the prescription of physical activity and graded  
24 21 exercise therapy)[39-41]. Early indications of the effectiveness of a personalised approach have  
25 22 been positive[42], however, these lack the involvement of the lived patient experience in the  
26 23 design and testing process and so also risk rejection if not suitable in the applied setting. Gorna  
27 24 et al.[17] propose that an approach involving an individualised physical assessment by  
28 25 physicians with medical expertise to identify organ and multisystem dysfunction is needed.  
29 26 This could then inform individualised and wider rehabilitation plans that will also be inclusive  
30 27 of other key stakeholders (i.e., employers when employees are returning to work). However,  
31 28 broad representation must be a key consideration in future work to ensure robust advice is  
32 29 provided, and the inclusion of the lived experience of minority groups with Long COVID also  
33 30 needs to be better understood.

31 A limitation of COVID-19 research, inclusive of our work, is the lack of ethnic diversity, male  
32 representation and small sample sizes[13, 26, 36, 43-45]. Long COVID has a tendency to  
33 present more commonly in females than males[46], however, ethnic minorities have been

1 disproportionately affected by the COVID-19 pandemic[47-49]. A recent report by the  
2 National Institute for Health Research showed that the latter group constituted only 9% of  
3 cohorts in COVID-19 studies conducted in the UK. This is despite ethnic minorities  
4 constituting 14% of the general population in the UK[50]. Current barriers to taking part in  
5 COVID-19 research have been postulated to include access to health services, language, and  
6 mistrust[43-45, 51, 52]. Gopal and colleagues[52] explain that existing equality and diversity  
7 recommendations to tackle these barriers (i.e., cultural competency training) have the potential  
8 to do more harm than good through ethnocentrism and stereotyping. Instead, they recommend  
9 that a Cultural Safety approach engrained within a deep medicine ideology would be most  
10 appropriate. By focusing on the individual experience of care, staff self-reflexivity, and  
11 structural reflexivity, Gopal et al.[52] postulate deep medicine would help overcome barriers  
12 such as mistrust and, subsequently, may help facilitate researcher-participant relationships in  
13 future research[53, 54]. Developing rapport by establishing and aligning with key principles  
14 valued by patients and reflecting with peers that challenge our own biases are just a couple of  
15 key examples of how future studies may look to develop trust and provide a safe, reassuring  
16 environment for ethnic minorities. This would be especially valuable in observational studies  
17 such as our own that require participant engagement over a prolonged period.

## 18 **CONCLUSIONS**

19 This study has added to a growing body of literature in sharing the lived experience of Long  
20 COVID from the perspective of the patients. Over 16 weeks, our work recognised the broad,  
21 disabling, and episodic symptom profile of people living with Long COVID. It is vital more is  
22 done to support an already isolated group in a manner that not only provides validation to the  
23 Long COVID patient, but also a specific and adaptive support system that addresses the milieu  
24 of symptoms and undulating nature synonymous with Long COVID.

1  
2  
3 1 **Acknowledgements:** We would like to extend our sincere gratitude to our patients for their  
4 2 time, support, and development of our research on Long COVID.

5  
6  
7 3 **Competing interest:** No potential competing interest was reported by the authors.

8  
9  
10 4 **Funding:** This study was supported by an unrestricted investigator-sponsored research grant  
11 5 from Gilead Sciences (#IN-UK-983-6080).

12  
13  
14 6 **Contributorship Statement:** MAF and REA conceived the idea of the study. All partners  
15 7 were involved in recruitment and screening meanwhile CT, RO, and JY led data collection. CT  
16 8 led data analysis and the writing of the manuscript, and all authors contributed to the  
17 9 development of the submitted manuscript and approved this before submission.

18  
19  
20  
21  
22 10 **Data sharing statement:** Anonymised data can be made available on request.  
23  
24  
25  
26  
27  
28  
29  
30  
31  
32  
33  
34  
35  
36  
37  
38  
39  
40  
41  
42  
43  
44  
45  
46  
47  
48  
49  
50  
51  
52  
53  
54  
55  
56  
57  
58  
59  
60

1  
2  
3 **1 REFERENCES**  
4

- 5  
6 2 1. Faghy, M.A.O., Rebecca. Thomas, Callum. Yates, James. Ferraro, Francesco V. Skipper, Lindsay.  
7 3 Barley McMullen, Sarah. Brown, Darren A. Arena, Ross. Ashton, Ruth EM. , *Is Long COVID the*  
8 4 *next global health crisis?* Journal of Global Health, In press.
- 9 5 2. Ge, Y., et al., *Effects of worldwide interventions and vaccination on COVID-19 between waves*  
10 6 *and countries.* 2021.
- 11 7 3. Abideen, A.Z., F.B. Mohamad, and M.R. Hassan, *Mitigation strategies to fight the COVID-19*  
12 8 *pandemic—present, future and beyond.* Journal of Health Research, 2020. **34**(6): p. 547-562.
- 13 9 4. Collie, S., et al., *Effectiveness of BNT162b2 Vaccine against Omicron Variant in South Africa.*  
14 10 *New England Journal of Medicine,* 2022. **386**(5): p. 494-496.
- 15 11 5. England, P., *New data show vaccines reduce severe COVID-19 in older adults.* 2021.
- 16 12 6. Perego, E., et al., *Why the Patient-Made Term 'Long Covid' is needed.* Wellcome Open  
17 13 *Research,* 2020. **5**: p. 224.
- 18 14 7. WHO. *A clinical case definition of post COVID-19 condition by a Delphi consensus, 6 October*  
19 15 *2021.* 2021 [22/07/2022]; Available from: [https://www.who.int/publications/i/item/WHO-](https://www.who.int/publications/i/item/WHO-2019-nCoV-Post_COVID-19_condition-Clinical_case_definition-2021.1)  
20 16 [2019-nCoV-Post COVID-19 condition-Clinical case definition-2021.1.](https://www.who.int/publications/i/item/WHO-2019-nCoV-Post_COVID-19_condition-Clinical_case_definition-2021.1)
- 21 17 8. ONS. *Prevalence of ongoing symptoms following coronavirus (COVID-19) infection in the UK:*  
22 18 *7 July 2022.* 2022; Available from:  
23 19 [https://www.ons.gov.uk/peoplepopulationandcommunity/healthandsocialcare/conditionsa](https://www.ons.gov.uk/peoplepopulationandcommunity/healthandsocialcare/conditionsanddiseases/bulletins/prevalenceofongoingsymptomsfollowingcoronaviruscovid19infectionintheuk/7july2022)  
24 20 [nddiseases/bulletins/prevalenceofongoingsymptomsfollowingcoronaviruscovid19infectionin](https://www.ons.gov.uk/peoplepopulationandcommunity/healthandsocialcare/conditionsanddiseases/bulletins/prevalenceofongoingsymptomsfollowingcoronaviruscovid19infectionintheuk/7july2022)  
25 21 [theuk/7july2022.](https://www.ons.gov.uk/peoplepopulationandcommunity/healthandsocialcare/conditionsanddiseases/bulletins/prevalenceofongoingsymptomsfollowingcoronaviruscovid19infectionintheuk/7july2022)
- 26 22 9. Wulf Hanson, S., et al., *A global systematic analysis of the occurrence, severity, and recovery*  
27 23 *pattern of long COVID in 2020 and 2021.* medRxiv, 2022.
- 28 24 10. Jayasinghe, S., M.A. Faghy, and A.P. Hills, *Social justice equity in healthy living medicine-An*  
29 25 *international perspective.* Progress in Cardiovascular Diseases, 2022.
- 30 26 11. Mishra, V., et al., *Health Inequalities During COVID-19 and Their Effects on Morbidity and*  
31 27 *Mortality.* J Healthc Leadersh, 2021. **13**: p. 19-26.
- 32 28 12. Alwan, N.A., *Surveillance is underestimating the burden of the COVID-19 pandemic.* The  
33 29 *Lancet,* 2020. **396**(10252).
- 34 30 13. Davis, H.E., et al., *Characterizing long COVID in an international cohort: 7 months of symptoms*  
35 31 *and their impact.* EClinicalMedicine, 2021. **38**: p. 101019.
- 36 32 14. Faghy, M.A., et al., *COVID-19 patients require multi-disciplinary rehabilitation approaches to*  
37 33 *address persisting symptom profiles and restore pre-COVID quality of life.* Expert Rev Respir  
38 34 *Med,* 2022. **16**(5): p. 595-600.
- 39 35 15. Hayes, L.D., J. Ingram, and N.F. Sculthorpe, *More Than 100 Persistent Symptoms of SARS-CoV-2*  
40 36 *(Long COVID): A Scoping Review.* Front Med (Lausanne), 2021. **8**: p. 750378.
- 41 37 16. Brown, D.A. and K.K. O'Brien, *Conceptualising Long COVID as an episodic health condition.*  
42 38 *BMJ Glob Health,* 2021. **6**(9).
- 43 39 17. Gorna, R., et al., *Long COVID guidelines need to reflect lived experience.* *Lancet,* 2021.  
44 40 **397**(10273): p. 455-457.
- 45 41 18. Callan, C., et al., *'I can't cope with multiple inputs': a qualitative study of the lived experience*  
46 42 *of 'brain fog' after COVID-19.* BMJ Open, 2022. **12**(2): p. e056366.
- 47 43 19. Witvliet, M.G., *My 15-month rollercoaster ride with COVID-19: A social epidemiologist's*  
48 44 *perspective.* Scand J Public Health, 2022. **50**(1): p. 1-3.
- 49 45 20. Roulin, M.J., S. Hurst, and R. Spirig, *Diaries written for ICU patients.* Qual Health Res, 2007.  
50 46 **17**(7): p. 893-901.
- 51 47 21. Sansone, V., et al., *Narrative Diaries in Pediatrics: A Scoping Review.* J Pediatr Nurs, 2021. **59**:  
52 48 p. e93-e105.

- 1  
2  
3 1 22. Britton, C. and A. Moore, *Views from the Inside, Part 1: Routes to Diagnosis — Families' Experience of Living with a Child with Arthritis*. British Journal of Occupational Therapy, 2002. **65**(8): p. 374-380.
- 4 2  
5 3  
6 4 23. Chaturvedi, R., et al., *COVID-19 complications in males and females: recent developments*. J Comp Eff Res, 2022. **11**(9): p. 689-698.
- 7 5  
8 6 24. Aiyegbusi, O.L., et al., *Symptoms, complications and management of long COVID: a review*. Journal of the Royal Society of Medicine, 2021. **114**(9): p. 428-442.
- 9 7  
10 8 25. Raveendran, A.V., R. Jayadevan, and S. Sashidharan, *Long COVID: An overview*. Diabetes Metab Syndr, 2021. **15**(3): p. 869-875.
- 11 9  
12 10 26. Ladds, E., et al., *Persistent symptoms after Covid-19: qualitative study of 114 "long Covid" patients and draft quality principles for services*. BMC Health Services Research, 2020. **20**(1).
- 13 11  
14 12 27. Burgoyne, R.W., et al., *Long-Term Quality-of-Life Outcomes Among Adults Living with HIV in the HAART Era: The Interplay of Changes in Clinical Factors and Symptom Profile*. AIDS and Behavior, 2004. **8**(2): p. 151-163.
- 15 13  
16 14 28. Boix, V. and E. Merino, *Post-COVID syndrome. The never ending challenge*. Med Clin (Engl Ed), 2022. **158**(4): p. 178-180.
- 17 15  
18 16 29. Brown, K., et al., *Long COVID and self-management*. Lancet, 2022. **399**(10322): p. 355.
- 19 17  
20 18 30. Davies, M., *Long covid patients travel abroad for expensive and experimental "blood washing"*. BMJ, 2022: p. o1671.
- 21 19  
22 20 31. NHS. *Cognitive and emotional effects of recovering from COVID-19*. n.d [18/08/2022]; Available from: <https://www.cuh.nhs.uk/our-services/neuropsychology/guide-cognitive-and-emotional-effects-recovering-covid-19/>.
- 23 21  
24 22 32. Houben-Wilke, S., et al., *The Impact of Long COVID-19 on Mental Health: Observational 6-Month Follow-Up Study*. JMIR Mental Health, 2022. **9**(2): p. e33704.
- 25 23  
26 24 33. Ashton, R., et al., *COVID-19 and the long-term cardio-respiratory and metabolic health complications*. Rev Cardiovasc Med, 2022. **23**(2): p. 53.
- 27 25  
28 26 34. Faghy, M.A., et al., *The need for exercise sciences and an integrated response to COVID-19: A position statement from the international HL-PIVOT network*. Prog Cardiovasc Dis, 2021. **67**: p. 2-10.
- 29 27  
30 28 35. Faghy, M.A., et al., *Integrated sports and respiratory medicine in the aftermath of COVID-19*. The Lancet Respiratory Medicine, 2020. **8**(9): p. 852.
- 31 29  
32 30 36. Macpherson, K., et al., *Experiences of living with long COVID and of accessing healthcare services: a qualitative systematic review*. BMJ Open, 2022. **12**(1): p. e050979.
- 33 31  
34 32 37. Oliver, D., *David Oliver: The NHS's understaffing is its Achilles' heel*. BMJ, 2017. **357**: p. j2192.
- 35 33  
36 34 38. Sivan, M., et al., *Long COVID Multidisciplinary consortium Optimising Treatments and servlces acrOss the NHS (LOCOMOTION): protocol for a mixed-methods study in the UK*. BMJ open, 2022. **12**(5): p. e063505.
- 37 35  
38 36 39. D'Souza, A.F., *Long COVID: implications for physiotherapy*. European Journal of Physiotherapy, 2021. **23**(6): p. 384-384.
- 39 37  
40 38 40. Decary, S., et al., *Humility and Acceptance: Working Within Our Limits With Long COVID and Myalgic Encephalomyelitis/Chronic Fatigue Syndrome*. J Orthop Sports Phys Ther, 2021. **51**(5): p. 197-200.
- 41 39  
42 40 41. Vink, M. and A. Vink-Niese, *The Updated NICE Guidance Exposed the Serious Flaws in CBT and Graded Exercise Therapy Trials for ME/CFS*. Healthcare (Basel), 2022. **10**(5).
- 43 41  
44 42 42. Yong, S.J., *Long COVID or post-COVID-19 syndrome: putative pathophysiology, risk factors, and treatments*. Infectious Diseases, 2021. **53**(10): p. 737-754.
- 45 43  
46 44 43. Chastain, D.B., et al., *Racial Disproportionality in Covid Clinical Trials*. New England Journal of Medicine, 2020. **383**(9): p. e59.
- 47 45  
48 46 44. Etti, M., et al., *Ethnic minority and migrant underrepresentation in Covid-19 research: Causes and solutions*. EclinicalMedicine, 2021. **36**: p. 100903.
- 49 47  
50 48  
51 49  
52 50  
53 51  
54 52  
55 53  
56 54  
57 55  
58 56  
59 57  
60 58



- 1  
2  
3 1 45. Sirotich, E. and J.S. Hausmann, *Removing barriers and disparities in health: lessons from the*  
4 2 *COVID-19 pandemic*. Nature Reviews Rheumatology, 2021. **17**(3): p. 125-126.  
5 3 46. Sylvester, S.V., et al., *Sex differences in sequelae from COVID-19 infection and in long COVID*  
6 4 *syndrome: a review*. Curr Med Res Opin, 2022: p. 1-9.  
7 5 47. Jaljaa, A., et al., *Risk of SARS-CoV-2 infection in migrants and ethnic minorities compared with*  
8 6 *the general population in the European WHO region during the first year of the pandemic: a*  
9 7 *systematic review*. BMC Public Health, 2022. **22**(1).  
10 8 48. Kirby, T., *Evidence mounts on the disproportionate effect of COVID-19 on ethnic minorities*.  
11 9 The Lancet Respiratory Medicine, 2020. **8**(6): p. 547-548.  
12 10 49. Tai, D.B.G., et al., *Disproportionate Impact of COVID-19 on Racial and Ethnic Minority Groups*  
13 11 *in the United States: a 2021 Update*. Journal of Racial and Ethnic Health Disparities, 2021.  
14 12 50. NIHR. *NIHR research ethnicity data provides insight on participation in COVID-19 studies*  
15 13 *[Internet]*. . 2020 04/06/2022]; Available from: [https://www.nihr.ac.uk/news/nihr-research-](https://www.nihr.ac.uk/news/nihr-research-ethnicity-data-provides-insight-on-participation-in-covid-19-studies/26460)  
16 14 [ethnicity-data-provides-insight-on-participation-in-covid-19-studies/26460](https://www.nihr.ac.uk/news/nihr-research-ethnicity-data-provides-insight-on-participation-in-covid-19-studies/26460).  
17 15 51. Enria, L., et al., *Power, fairness and trust: understanding and engaging with vaccine trial*  
18 16 *participants and communities in the setting up the EBOVAC-Salone vaccine trial in Sierra*  
19 17 *Leone*. BMC Public Health, 2016. **16**(1).  
20 18 52. Gopal, D.P., et al., *Reflexivity, Cultural Safety, and improving the health of racially minoritised*  
21 19 *communities*. The Lancet, 2022. **399**(10335): p. 1581-1582.  
22 20 53. Diallo, B.A., et al., *Clinical research on COVID-19: perceptions and barriers to participation in*  
23 21 *The Gambia*. BMJ Global Health, 2022. **7**(2): p. e007533.  
24 22 54. Schmotzer, G.L., *Barriers and facilitators to participation of minorities in clinical trials*.  
25 23 *Ethnicity & Disease*, 2012. **22**(2): p. 226-30.  
26 24  
27  
28  
29  
30

## 31 APPENDICES

### 32 Appendix A – Theme 1 additional quotes:

33 34 35 36 37 38 39 40 41 42 43 44 45 46 47 48 49 50 51 52 53 54 55 56 57 58 59 60

35 27 “Struggled to get up/ fatigue. Short of breath. Tinnitus horrendous every day. sore throat.  
36 28 Cannot sleep. Lymph nodes swollen Clavicle/ underarm. Aching like I have the flu.”  
37 29 “Feeling exhausted had a steady day out with my hubby and he did all of the driving.”  
38 30 “Felt really drained and lacking energy again. Slept for a short time at lunchtime. Cried  
39 31 because I was so tired, I didn't have the energy to drive to hospital to visit husband. Got son  
40 32 to take me.”  
41 33 “Sunday funday. Cinema with son. It was the best day of his life. Mean so very much to hear  
42 34 and see him enjoy himself. Had to be up early to get there so slept in car on way home in  
43 35 traffic.”

### 36 Appendix B – Theme 2 additional quotes:

37 38 “Attended university research programme... Pretty exhausting mentally... Lay on the bed all  
39 38 afternoon and retired at 9:00pm - so very tired with no energy.”

1  
2  
3 1 *“Had a rest day still having muscle pain and nerve pain and muscle twitches.”*  
4

5  
6 2 *“Great effort required to climb stairs. Legs painful and like Jelly.”*  
7

8  
9 3 *“Short of breath for most of the journey. How can be sitting as a passenger in the car be so*  
10 4 *tiring.”*  
11

12  
13 5 *“Rested the rest of the day - headache increased”*  
14

15  
16 6 *“Took my dog for a slow short walk - very difficult to do and took twice as long.”*  
17

18  
19 7 *“Walked 50 metres... very tiring and struggled with breathing on return journey.”*  
20

21  
22 8 *“Anxiety - through the roof at times but that due to work, money issues.”*  
23

24 9 **Appendix C – Theme 3 additional quotes:**  
25

26  
27 10 *“Heart pounding today for most of day. Emotionally very angry today (for no reason). Did*  
28 11 *very little today - watched TV and visited family. poor appetite today.”*  
29

30  
31 12 *“Make me feel down when I go out and see how fast other people move about or is it just that*  
32 13 *I am so slow.”*  
33

34  
35 14 **Appendix D – Theme 4 additional quotes:**  
36

37  
38 15 *“Everything seems like one step forward and two steps back”*  
39  
40  
41 16  
42  
43  
44  
45  
46  
47  
48  
49  
50  
51  
52  
53  
54  
55  
56  
57  
58  
59  
60



ID bmjopen-2020-041038 SRQR Checklist

|                                                    | Item                                                                                                                                                                                                                                                                                                                                                                                                 | Page           |
|----------------------------------------------------|------------------------------------------------------------------------------------------------------------------------------------------------------------------------------------------------------------------------------------------------------------------------------------------------------------------------------------------------------------------------------------------------------|----------------|
| <b>Title</b>                                       | Item 1. Title: Concise description of the nature and topic of the study. Identifying the study as qualitative or indicating the approach (e.g., ethnography, grounded theory) or data collection methods (e.g., interview, focus group) is recommended.                                                                                                                                              | page 1         |
| <b>Abstract</b>                                    | Item 2. Abstract: Summary of key elements of the study using the abstract format of the intended publication; typically includes background, purpose, methods, results, and conclusions.                                                                                                                                                                                                             | page 2         |
| <b>Problem Formulation</b>                         | Item 3. Problem Formulation: Description and significance of the problem/phenomenon studied; review of relevant theory and empirical work; problem statement.                                                                                                                                                                                                                                        | pages 3-5      |
| <b>Purpose or research question</b>                | Item 4. Purpose or research question: Purpose of the study and specific objectives or questions.                                                                                                                                                                                                                                                                                                     | page 5         |
|                                                    | Item 5. Qualitative approach and research paradigm: Qualitative approach (e.g., ethnography, grounded theory, case study, phenomenology, narrative research) and guiding theory if appropriate; identifying the research paradigm (e.g., post-positivist, constructivist/interpretivist) is also recommended; rationale                                                                              | pages 2, 5 & 6 |
|                                                    | Item 6. Researcher characteristics and reflexivity: Researchers' characteristics that may influence the research, including personal attributes, qualifications/experience, relationship with participants, assumptions, and/or presuppositions; potential or actual interaction between researchers' characteristics and the research questions, approach, methods, results and/or transferability. | page 5         |
| <b>Context</b>                                     | Item 7. Context: Setting/site and salient contextual factors; rationale.                                                                                                                                                                                                                                                                                                                             | pages 2 & 5    |
| <b>Sampling strategy</b>                           | Item 8. Sampling strategy: How and why research participants, documents, or events were selected; criteria for deciding when no further sampling was necessary (e.g., sampling saturation); rationale.                                                                                                                                                                                               | page 5         |
| <b>Ethical issues pertaining to human subjects</b> | Item 9. Ethical issues pertaining to human subjects: Documentation of approval by an appropriate ethics review board and participant consent, or explanation for lack thereof; other confidentiality and data security issues.                                                                                                                                                                       | page 5         |

|                                                     |                                                                                                                                                                                                                                                                                                                                                                                                               |                  |
|-----------------------------------------------------|---------------------------------------------------------------------------------------------------------------------------------------------------------------------------------------------------------------------------------------------------------------------------------------------------------------------------------------------------------------------------------------------------------------|------------------|
|                                                     | Item 10. Data collection methods: Types of data collected; details of data collection procedures including (as appropriate) start and stop dates of data collection and analysis, iterative process, triangulation of sources/methods, and modification of procedures in response to evolving study findings; rationale.                                                                                      | page 5           |
| <b>Data collection instruments and technologies</b> | Item 11. Data collection instruments and technologies: Description of instruments (e.g., interview guides, questionnaires) and devices (e.g., audio recorders) used for data collection; if/how the instrument(s) changed over the course of the study.                                                                                                                                                       | page 5           |
| <b>Units of study</b>                               | Item 12. Units of study: Number and relevant characteristics of participants, documents, or events included in the study; level of participation.                                                                                                                                                                                                                                                             | pages 5 & 6      |
| <b>Data processing</b>                              | Item 13. Data processing: Methods for processing data prior to and during analysis, including transcription, data entry, data management and security, verification of data integrity, data coding and anonymization / de-identification of excerpts.                                                                                                                                                         | page 6           |
| <b>Data analysis</b>                                | Item 14. Data analysis: Process by which inferences, themes, etc. were identified and developed, including the researchers involved in data analysis; usually references a specific paradigm or approach; rationale.                                                                                                                                                                                          | page 6           |
| <b>Techniques to enhance trustworthiness</b>        | Item 15. Techniques to enhance trustworthiness: Techniques to enhance trustworthiness and credibility of data analysis,(e.g., member checking, triangulation, audit trail); rationale                                                                                                                                                                                                                         | page 6           |
| <b>Synthesis and interpretation</b>                 | Item 16. Synthesis and interpretation: Main findings (e.g., interpretations, inferences, and themes); might include development of a theory or model, or integration with prior research or theory.                                                                                                                                                                                                           | pages 6 & 13     |
| <b>Links to empirical data</b>                      | Item 17. Links to empirical data: Evidence (e.g., quotes, field notes, text excerpts, photographs) to substantiate analytic findings.                                                                                                                                                                                                                                                                         | pages 13 - 16    |
|                                                     | Item 18. Integration with prior work, implications, transferability, and contribution(s) to the field: Short summary of main findings, explanation of how findings and conclusions connect to, support, elaborate on, or challenge conclusions of earlier scholarship; discussion of scope of application/generalizability; identification of unique contribution(s) to scholarship in a discipline or field. | pages 13-16      |
| <b>Limitations</b>                                  | Item 19. Limitations: Trustworthiness and limitations of findings                                                                                                                                                                                                                                                                                                                                             | pages 3, 15 & 16 |

1  
2  
3  
4  
5  
6  
7  
8  
9  
10  
11  
12  
13  
14  
15  
16  
17  
18  
19  
20  
21  
22  
23  
24  
25  
26  
27  
28  
29  
30  
31  
32  
33  
34  
35  
36  
37  
38  
39  
40  
41  
42  
43  
44  
45  
46  
47  
48  
49  
50  
51  
52  
53  
54  
55  
56  
57  
58  
59  
60

|                              |                                                                                                                                                 |         |
|------------------------------|-------------------------------------------------------------------------------------------------------------------------------------------------|---------|
| <b>Conflicts of interest</b> | Item 20. Conflicts of interest: Potential sources of influence or perceived influence on study conduct and conclusions; how these were managed. | page 17 |
| <b>Funding</b>               | Item 21. Funding: Sources of funding and other support; role of funders in data collection, interpretation, and reporting.                      | page 17 |

For peer review only

# BMJ Open

## Long COVID, the lived experience of patients from a cohort observation in the UK.

|                                 |                                                                                                                                                                                                                                                                                                                                                                      |
|---------------------------------|----------------------------------------------------------------------------------------------------------------------------------------------------------------------------------------------------------------------------------------------------------------------------------------------------------------------------------------------------------------------|
| Journal:                        | <i>BMJ Open</i>                                                                                                                                                                                                                                                                                                                                                      |
| Manuscript ID                   | bmjopen-2022-068481.R1                                                                                                                                                                                                                                                                                                                                               |
| Article Type:                   | Original research                                                                                                                                                                                                                                                                                                                                                    |
| Date Submitted by the Author:   | 22-Feb-2023                                                                                                                                                                                                                                                                                                                                                          |
| Complete List of Authors:       | Thomas, Callum; University of Derby, College of Science and Engineering<br>Faghy, MARK; University of Derby,<br>Owen, Rebecca; University of Derby,<br>Yates, James; University of Derby<br>Ferraro, Francesco; University of Derby<br>Bewick, Tom; Burton NHS Foundation Trust<br>Haggan, Kate; Burton NHS Foundation Trust<br>Ashton, Ruth EM; University of Derby |
| <b>Primary Subject Heading</b>: | Public health                                                                                                                                                                                                                                                                                                                                                        |
| Secondary Subject Heading:      | Global health, Patient-centred medicine, Qualitative research, Rehabilitation medicine, Health services research                                                                                                                                                                                                                                                     |
| Keywords:                       | COVID-19, PUBLIC HEALTH, Public health < INFECTIOUS DISEASES                                                                                                                                                                                                                                                                                                         |
|                                 |                                                                                                                                                                                                                                                                                                                                                                      |

SCHOLARONE™  
Manuscripts

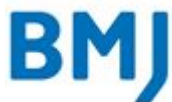

I, the Submitting Author has the right to grant and does grant on behalf of all authors of the Work (as defined in the below author licence), an exclusive licence and/or a non-exclusive licence for contributions from authors who are: i) UK Crown employees; ii) where BMJ has agreed a CC-BY licence shall apply, and/or iii) in accordance with the terms applicable for US Federal Government officers or employees acting as part of their official duties; on a worldwide, perpetual, irrevocable, royalty-free basis to BMJ Publishing Group Ltd ("BMJ") its licensees and where the relevant Journal is co-owned by BMJ to the co-owners of the Journal, to publish the Work in this journal and any other BMJ products and to exploit all rights, as set out in our [licence](#).

The Submitting Author accepts and understands that any supply made under these terms is made by BMJ to the Submitting Author unless you are acting as an employee on behalf of your employer or a postgraduate student of an affiliated institution which is paying any applicable article publishing charge ("APC") for Open Access articles. Where the Submitting Author wishes to make the Work available on an Open Access basis (and intends to pay the relevant APC), the terms of reuse of such Open Access shall be governed by a Creative Commons licence – details of these licences and which [Creative Commons](#) licence will apply to this Work are set out in our licence referred to above.

Other than as permitted in any relevant BMJ Author's Self Archiving Policies, I confirm this Work has not been accepted for publication elsewhere, is not being considered for publication elsewhere and does not duplicate material already published. I confirm all authors consent to publication of this Work and authorise the granting of this licence.

1 **Title: Long COVID, the lived experience of patients from a cohort observation in the UK.**

2 **Authors:** Callum Thomas<sup>1</sup>, Mark A Faghy<sup>1,2</sup>, Rebecca Owen<sup>1</sup>, James Yates<sup>1</sup>, Francesco V  
3 Ferraro<sup>1</sup>, Tom Bewick<sup>3</sup>, Kate Haggan<sup>3</sup>, Ruth EM Ashton<sup>1</sup>.

4 **Affiliations:**

- 5 1. School of Human Sciences, University of Derby, Derby, UK
- 6 2. Healthy Living for Pandemic Event Protection (HL – PIVOT) Network, Chicago, IL
- 7 3. Respiratory Medicine, University Hospitals of Derby and Burton NHS Foundation  
8 Trust, Derby, UK

9 **Corresponding Author:** Mr. Callum Thomas, Human Sciences Research Centre, University  
10 of Derby, England, UK. E: C.Thomas@Derby.ac.uk.

11 **Key Words:** Lived experience, COVID-19, Long COVID, Health and Wellbeing

1  
2  
3 **1 ABSTRACT**  
4

5  
6 *2 Background:* Long COVID is a rapidly evolving global health crisis requiring interdisciplinary  
7 support strategies that incorporate the lived experience of patients. Currently, there is a paucity  
8 of research documenting the day-to-day experiences of patients living with Long COVID.  
9

10  
11 *5 Objective:* To explore the lived experience of Long COVID patients.  
12

13  
14 *6 Study design:* Longitudinal qualitative cohort observation.  
15

16  
17 *7 Setting:* An inductive, data-driven, qualitative approach was used to evaluate hand-written  
18 diaries obtained from individuals who had been referred to a Derbyshire Long COVID clinic.  
19

20  
21 *9 Participants:* 12 participants (11 females, age  $49 \pm 10$  years, 11 Caucasians) were recruited.  
22 Participants were included if they had a previous confirmed or suspected COVID-19 infection  
23 with ongoing recovery, >18 years old, understood the study requirements and provided  
24 informed consent.  
25

26  
27  
28 *13 Method:* Participants were directed to complete self-report diaries over 16 weeks. Responses  
29 were transcribed verbatim and analysed using thematic analysis.  
30

31  
32 *15 Results:* Three key themes were highlighted; (1) a need to further understand symptoms and  
33 symptom management, (2) the impact upon the quality of life and health status, and (3) the  
34 effect of turbulent and episodic symptom profiles on personal identity and recovery.  
35

36  
37  
38 *18 Conclusions:* The novel challenges presented by Long COVID are complex with varying  
39 interrelated factors that are broadly impacting functional status and quality of life. Support  
40 mechanisms must incorporate the lived experiences and foster true collaborations between  
41 health professionals, patients, and researchers to improve patient outcomes.  
42

43  
44  
45 *22 Trial registration:* NCT04649957.  
46  
47  
48  
49  
50  
51  
52  
53  
54  
55  
56  
57  
58  
59  
60

## STRENGTHS AND LIMITATIONS OF THE STUDY

- Self-report diaries are flexible and adaptable methods that allow participants to record their feelings and lived experiences at their convenience.
- The diaries allowed participants to open up and reveal nuanced details that, in the presence of a researcher, may not have been documented.
- The diaries allowed participants to document their experiences over time rather than at predetermined moments where they may not have been prepared physically or emotionally to answer.
- Participants were instructed to use the diaries freely and so entries were not made every day by some participants.

## INTRODUCTION

Over the time-course of the Coronavirus pandemic 2019 (COVID-19), international attention has predominantly focused on addressing the impact of acute infection. Thanks to effective and widespread vaccination this has undoubtedly reduced the severity of acute infections, observed by a reduction in hospitalisations and mortality[1, 2]. As such the focus has now shifted to restoring social and economic activities. Despite a shift in focus, we are still very much amid a pandemic that is demonstrating a lasting impact on public health[3]. Whilst vaccines reduce the likelihood of severe patient outcomes, it is established that vaccines do not prevent transmission or infection with SARS-COV-2 and they offer minimal protection against post-viral issues and symptom profiles, commonly referred to as Long COVID.

Defined by the World Health Organisation as '*individuals with probable or confirmed COVID-19 diagnosis presenting symptoms 3 months after symptom onset, and symptoms lasting at least 2 months that cannot be explained by an alternative diagnosis*'[4]. Recent statistics estimate that >2 million people in the United Kingdom (UK)[5] and 144.7 million globally[6] are living with long-term and debilitating symptom profiles of Long COVID[7]. The complex and episodic symptom profile is at the forefront of mechanistic investigations to increase pathological insight. Reports highlight the extent of physical, cognitive, and psychosocial symptoms (i.e., fatigue, brain fog, and anxiety) and the impact upon multiple bodily systems (i.e., cardiovascular, respiratory, and pulmonary system) that is becoming established[8-10] Davis et al.[8] identified three symptom clusters that have distinct temporal profiles, cluster 1 identified early symptoms that peak and then diminish (i.e., runny nose, loss of appetite, fever), cluster 2 represented stable symptoms (i.e., nausea, chest tightness, fatigue), meanwhile cluster



1  
2  
3 1 3 represented symptoms that initially increase sharply then either plateau or slightly increase  
4 2 or decrease over the following months (i.e., palpitations, brain fog, post-exertional malaise)[8].  
5 3 Another aspect reported via an online survey of Long COVID is the episodic nature of  
6 4 symptoms[11] with 86% of participants (n= 3,252, 95% Confidence Interval (CI), 84.8% to  
7 5 87.0%) having symptoms triggered or exacerbated by physical or mental activities[8].  
8  
9  
10 6 Recent data suggest that 1 in 10 positive SARS-CoV-2 infections will go on to experience long-  
11 7 term illness[8]. There is an unquestionable need to increase the pathological understanding to  
12 8 inform the design and development of bespoke and safe support services and pharmacological  
13 9 interventions for Long COVID patients. However, given the unique nature of COVID-19 and  
14 10 Long COVID, there is a need to engage the intended stakeholders and learn from the  
15 11 experiences of those living with this condition. Despite repeated calls from patients to  
16 12 incorporate the lived experience as a prominent feature in the design and implementation of  
17 13 research[12], there remains a lack of detail that provides thorough longitudinal insight from  
18 14 patients. Callan et al.[13] recognised the relapsing-remitting time course of Long COVID as  
19 15 an ‘episodic disability’ whereby participants reported brain fog that aligned with the  
20 16 unpredictable wellness and illness previously described in HIV-positive patients. However, the  
21 17 focus groups were followed up 4-6 months later by email and similarly provide a snapshot  
22 18 summary to that of online surveys. Witvliet[14] retrospectively revealed the details of her  
23 19 personal Long COVID journey which included nuanced details that would not be captured in  
24 20 clinical pathways. This detail could provide important insight to support clinical decision  
25 21 making but also in the development of Long COVID support pathways that are relevant,  
26 22 accepted, and lead to improved patient outcomes. Patient diaries have previously been used in  
27 23 intensive care units (ICU) and are useful tools to document patients’ lived experiences[15, 16].  
28 24 Diaries are flexible and adaptable tools that can be used anytime and away from face-to-face  
29 25 research and clinical settings[16] which can bridge the gap in communication between patients  
30 26 and healthcare providers[17]. Diaries can allow Long COVID patients to remember their  
31 27 experiences independent of recall bias and without eliciting emotional difficulty that is brought  
32 28 about with an in-person consultation. However, the use of diaries in documenting the day-to-  
33 29 day lived experience of individuals with Long COVID is not commonplace and there is a  
34 30 paucity of data obtained that documents the longitudinal lived experience which is important  
35 31 in the design and development of specific support mechanisms[12]. Accordingly, this study  
36 32 sought to capture the lived experience of individuals with Long COVID taking part in a 16-  
37 33 week cohort observation study collected via hand-written diaries.

## 1    **METHODS**

2    Following NHS research ethics approval (IRAS ID: 292920) and informed consent, qualitative  
3    accounts of the lived experience of 12 Long COVID participants were recorded via diaries over  
4    16 weeks. Previous post-viral research and the paucity of SARS-CoV-2 infection recovery  
5    information influenced the study design rationale of 16 weeks; however, we acknowledge  
6    current recovery time extends beyond this significantly. The diaries formed part of a larger  
7    cohort observation powered by sample analysis techniques of individuals recovering at home  
8    from a SARS-CoV-2 infection. The sample presented here was a sub-sample of patients that  
9    completed the study. Data from the diaries were monitored continuously and analysed until  
10    saturation. Participants were recruited following a referral from an established Long COVID  
11    clinic where a participant information sheet and contact details were provided to obtain any  
12    further detail/clarifications. Following the request to participate in the study, participants were  
13    passed onto the research team for consenting. As part of the study procedures listed entirely at  
14    clinicaltrials.gov (NCT04649957), participants were provided with and directed to freely use a  
15    self-report diary, that was returned and photocopied monthly, to capture information that they  
16    deemed appropriate as part of their post-COVID-19 journey. This exploratory approach was  
17    appropriate given the lack of understanding of the lived Long COVID experiences, and a  
18    greater need to inform the development of bespoke support mechanisms.

### 19    **Researcher characteristics**

20    Researchers from the University of Derby had bimonthly contact with participants and  
21    instructed them to use diaries freely; this should have had limited impact on how they were  
22    used. A member of the research team (CT) transcribed, coded, and thematically analysed all  
23    the diaries, and then uploaded completed transcriptions to a secure OneDrive file. Alongside  
24    regular meetings, diaries in this file were checked for accuracy by other members of the  
25    research team (MAF, REA, RO, JY, and FVF). CT had previous experience with interview  
26    transcription.

### 27    **Patient and Public Involvement and Engagement (PPIE) statement**

28    PPIE was a crucial part of the research design, implementation of the project, and interpretation  
29    of the resulting data reported in this manuscript. Previous research team experiences with  
30    pneumonia patients informed the data collection materials repurposed for this study.  
31    Participants were involved in raising awareness of our research to recruit participants in their

1 Long COVID networks and will also be involved in the dissemination of the results by sharing  
2 the findings with their support groups and networks.

### 3 **Data analysis**

4 Full diaries were transcribed verbatim and coded using the qualitative software NVIVO 12 Pro  
5 (Version 12.7, QSR International, Doncaster, Australia). An inductive, data-driven approach  
6 was adopted to code the data into descriptive terms which were collated to produce 12 themes  
7 and 82 sub-themes. Themes and sub-themes were grouped to generate three overarching  
8 themes, (1) a need to further understand symptoms and symptom management, (2) the impact  
9 upon the quality of life and health status, and (3) the effect of turbulent and episodic symptom  
10 profiles on personal identity and recovery. Theme coverage was also reported and denoted the  
11 percentage reporting of the theme across all the diaries. A sample of the data was shared with  
12 the trial steering group to check for accuracy and avoidance of interpretational bias.

## 13 **RESULTS**

14 Participant characteristics are detailed in Table 1 and are coincidentally skewed in  
15 representation towards white, middle-aged females, and are consistent with research in this  
16 area[18].

**Table 1:** Pooled participant pre-COVID, baseline and 16-week post-baseline measures  
(Mean  $\pm$  SD).

| Demographic Profile                        |           | Mean ( $\pm$ SD)                                                             |          |                 |
|--------------------------------------------|-----------|------------------------------------------------------------------------------|----------|-----------------|
| Age (years)                                |           | 49 $\pm$ 10                                                                  |          |                 |
| Sex                                        |           | Male (N=1)<br>Female (N=11)                                                  |          |                 |
| Ethnicity                                  |           | White British (N=11)                                                         |          |                 |
| Occupational Status                        |           | Employed Full Time (N=3)<br>Illness absence from work (N=8)<br>Retired (N=1) |          |                 |
| Index of Multiple Deprivation (IMD) Decile |           | 7 $\pm$ 3                                                                    |          |                 |
| Performance Status                         | Pre-COVID | Baseline                                                                     | 16-weeks | <i>P</i> values |

|                              |         |         |         |         |
|------------------------------|---------|---------|---------|---------|
| Overall health (AU)          | 2 ± 0.9 | 4 ± 0.6 | 3 ± 0.8 | < 0.001 |
| COVID-19 Symptom rating (AU) | -       | 8 ± 1   | 7 ± 2   | 0.324   |
| PCFS (AU)                    | -       | 3 ± 0.4 | 2 ± 0.8 | 0.054   |
| Dyspnoea (AU)                | -       | 3 ± 0.7 | 3 ± 0.8 | 1.000   |
| EQ5D-5L (AU)                 | -       | 13 ± 3  | 13 ± 5  | 0.575   |
| EQ5D-5L VAS (AU)             | -       | 46 ± 16 | 47 ± 22 | 0.691   |

Overall health score: 1-5 scale (1 = very good and 5 = very bad). COVID-19 Symptom score: 0–10 rating of symptom effect on daily life (0 = no impact / symptoms and 10 = symptom/s have had a big effect). PCFS: 0–4 scale of functional status (0 = no limitations and 4 = severe limitations). Dyspnoea: 1-5 scale of breathlessness (1 = breathless only with strenuous exercise and 5 = too breathless to leave the house). EQ5D-5L involves rating subcategories of mobility, self-care, usual activities, pain/discomfort, and anxiety/depression on a 1-5 scale (1 = no problems and 5 = extreme problems or inability). EQ5D-5L VAS: 0-100 scale of perceived overall health (0 = worst health they can imagine and 100 the best health they can imagine). Overall health data only for retrospective pre-COVID evaluation. AU, Arbitrary Unit, PCFS, Post COVID Functional Status, VAS, Visual Analogue Score. *P* values are derived from paired samples t-tests.

## Theme 1: Understanding symptom management

Symptom management received 66% coverage with 2,089/2911 references made to Long COVID symptoms. Furthermore, the broad and cyclical nature of symptoms highlights the day-to-day challenges associated with COVID-19 recovery:

*“... headache (lighter), aches/ pains in muscles/ joints, pains/ aches in chest, shortness of breath, brain pulsating, light ringing in ears. Thought I’d put the alarm on and I hadn’t, internal vibrations/pain in upper arms... kept losing focus in online training.”*

*“... went out for a meal with work for a couple of hours - felt good. Got home - symptoms returned intensely.”*

*“Pins and needles went yesterday evening. Arms feel wonderful again. No pins and needles in hand. Made such a difference to my mood today... Every day is a new day.”*

Nine out of the twelve diaries made references relating to the awareness and availability of healthcare support to help participants cope with the challenges of living with Long COVID. There were regular suggestions that the services were unhelpful, underdeveloped, and slow:

*“...neurology appointment came away disappointed and angry at lack of understanding...”*

1  
2  
3 1 *“Felt the doctor (as in GP) needs awareness raising more to Long COVID.”*

4  
5  
6 2 *“Chased Long COVID clinic been waiting since 25th June. Still, 2.5 months to wait at*  
7  
8 3 *least!!”*

9  
10 4 In response to frustration at a lack of services, participants reported opting to try self-treatment  
11 5 methods with mixed results. These include self-prescribed vitamin supplementation or changes  
12 6 to diet:

13  
14  
15  
16 7 *“Can feel the benefits of B 12 – less fatigue.”*

17  
18  
19 8 *“Still feel antihistamines and low histamine diet do help.”*

20  
21 9 Other instances highlight that some experimental treatments resulted in symptom exacerbation:

22  
23  
24 10 *“...went to... oxygen centre for an intense therapy trial. Had to stop procedure after 15*  
25 11 *minutes due to intensifying chest pain and blurred vision”*

26  
27  
28 12 *“Oxygen therapy. extremely tired, confusion + brain”*

29  
30  
31 13 Despite this frustration, there was recognition that care services to appropriately support their  
32 14 needs are developing:

33  
34  
35 15 *“Occupational therapist through LC clinic really supportive/ helpful.”*

36  
37  
38 16 *“Now seen CF [Chronic fatigue] clinic and improving pacing”*

39  
40  
41 17 Furthermore, a doctor within an established Long COVID clinic was able to identify symptoms  
42 18 associated with a pulmonary embolism and was able to make a referral for further examination.

43  
44  
45 19 *“Very good referrals to fatigue clinic, breathing clinic, vocational rehab, blood tests, eye*  
46 20 *checks. Go to A&E for blood clot check.”*

47  
48  
49 21 The role of the family as part of the lived experience was also repeatedly noted. However, akin  
50 22 to healthcare support services, the data provided mixed findings. For example, some  
51 23 participants were very dependent on family and the support provided was crucial to everyday  
52 24 life and functional activity:

53  
54  
55  
56  
57 25 *“In a lot of pain after the walk, not comfortable going out without my wife support.”*

58  
59  
60 26 *“Totally exhausted and hardly able to do anything, my husband is looking after me.”*

1  
2  
3 1 The diaries also revealed that participants played an important role in supporting their families,  
4 usually in the form of some sort of task or responsibility. This commonly served to exacerbate  
5 symptoms such as brain fog which had negative outcomes:  
6  
7

8  
9 4 *“Saw son + his girlfriend so cooked lunch for them - was fab to see them but wiped me out -*  
10 *everything ached and was shattered!!”*  
11

12  
13 6 *“Stayed at sons for night to look after his dogs, flooded kitchen, (forgot I'd left tap on).”*  
14

## 15 16 7 **Theme 2: Quality of Life status**

17  
18 8 Symptoms were closely associated with QoL (29% coverage). This theme not only identified  
19 the impact on functional status and ability of participants to be physically active but also the  
20 numerous times they needed to recover and manage symptoms accordingly. Commonly  
21 reported symptoms of tiredness, fatigue, and exhaustion were often managed with recovery  
22 periods:  
23  
24

25  
26 13 *“...visit to see my Auntie. An exhausting day... genuine chest pain and tightness so sat*  
27 *down... my chest problems are worsening... exhausted so went upstairs straight away.”*  
28

29  
30 15 *“Went to a church service, walked but it was very slow, tiring and cause chest tightness.*  
31 *Went and lay on the bed all of the afternoon. Couldn't remember how long I slept.”*  
32

33  
34 17 Regardless of whether recovery was acute (i.e., a quick nap on the sofa) or prolonged (i.e.,  
35 resting all day in bed), symptoms were not consistently alleviated, and it was commonplace for  
36 symptoms to persist and often become exacerbated:  
37  
38

39  
40 20 *“Rested from 5pm - After a couple of hours symptoms intensified again. Had conversation*  
41 *with a friend and kept forgetting simple words.”*  
42

43  
44 22 *“Rested all afternoon. Made tea / struggled to walk my dog. All symptoms intensified, unable*  
45 *to do anything else, pains in muscles/joints particularly fingers/hands, forearms and elbows.*  
46 *Light headedness.”*  
47

48  
49 25 Persistent symptomology also impacted routine functional activities that pre-COVID-19  
50 infection would have likely taken less time and energy to complete. This ranged from difficulty  
51 to concentrate during a task, as well as prolonging the length of time to complete that activity:  
52  
53

54  
55 26 *“...writing Christmas cards out of my mind. Completed them but it took three hours. It took*  
56  
57  
58  
59  
60

1  
2  
3 1 *me three times longer than before I had Long COVID.* “

4  
5  
6 2 *“Took all day to Hoover and Polish”*

7  
8  
9 3 The ability to exercise had also changed, with a few accounts of low volume cycling, or light  
10 4 cross-trainer or treadmill activities reported. In most instances, targeted exercise for  
11 5 participants was intolerable:

12  
13  
14 6 *“The physios want me to continue the exercises at home but that is impossible for me to do.”*

15  
16  
17 7 *“Exercise but everything seems like one step forward and two steps [back]”*

18  
19 8 There was a determination from participants to engage in physical activities. Walking was  
20 9 frequently reported however was consistently linked with an exacerbation of symptoms:

21  
22  
23 10 *“Try taking my dog for a walk... This was hard as my legs felt heavy and tired to move.”*

24  
25  
26 11 *“Walked 50 metres... very tiring and struggled with breathing on return journey.”*

27  
28  
29 12 Return to work was affected by Long COVID symptoms and some participants did not feel  
30 13 prepared to resume their careers due to the physical and mental challenges of work:

31  
32  
33 14 *“I am signed off work... still feel I would be unable to return to work at present (feel*  
34 15 *concerned whether I will ever be able to [return to] my job as a community nurse as it is a*  
35 16 *mentally and physically demanding role).”*

36  
37  
38  
39 17 However, participants who returned to work described the experience as a “fight”, while having  
40 18 to manage the challenges of their symptoms alongside the financial pressures of having had an  
41 19 extensive period of leave from work:

42  
43  
44  
45 20 *“Having to fight for every step as well as being ill.”*

46  
47  
48 21 *“Grief from work - half pay without notice.”*

49  
50 22 A key facet in all activities was the role of pacing. Participants were often keen to be functional  
51 23 and active, and pacing strategies helped them manage these activities:

52  
53  
54 24 *“Very tired this evening but know I would be so tea out the freezer. Getting better on these*  
55 25 *days. I'm not superhuman. I can pace.”*

56  
57  
58  
59 26 *“Very tiring week... paced myself each day.”*

60



1  
2  
3 1 Specifically, advice from other people sharing their experiences helped participants pace and  
4 2 manage activities in their own lives:

5  
6  
7 3 *“Interesting interview on Lorraine with Nick Knowles TV presenter. after having COVID and*  
8 4 *wanting to get back into shape he returned to the gym and found exercised knocked him back*  
9 5 *with recovery. Quite interesting I think, since I've eased off with my morning gym sessions, I*  
10 6 *think it may be helping my recovery?”*

11  
12  
13  
14  
15 7 Another finding was that participants could pace their activities feeling ok until they stopped,  
16 8 thereafter symptoms were unbearable:

17  
18  
19 9 *“Helped install CCTV system, wanted to do something normal [to] see how I got on. Lots of*  
20 10 *breaks, pace myself, painkillers. Was OK until I stopped. Symptoms intensified immensely,*  
21 11 *nine out of 10”*

22  
23  
24  
25  
26 12 Therefore, it does seem that there is a limit of tolerance on the extent to which pacing can help  
27 13 during a particular activity, with education on the cumulative activity load across a time  
28 14 needing to be established:

29  
30  
31 15 *“Went to horse again and a walked at a steady pace with regular stops to get some fresh air.*  
32 16 *Left ear still blocked, whooshing and earache, left arm still weak and unable to lift for long*  
33 17 *without getting a cramping pain. Pain in feet and internal vibrations at night, still coughing*  
34 18 *phlegm up and a cough...”*

35  
36  
37  
38  
39 19 The symptom exacerbation following activities was widely reported, however, participants  
40 20 chose to still engage with certain activities despite knowing that symptoms would occur during  
41 21 or afterwards:

42  
43  
44  
45 22 *“Went to a family wedding at 1:00pm. Very hard to make the effort but enjoyed seeing my*  
46 23 *nephew getting married. Had to leave early, was totally exhausted and went to bed at*  
47 24 *7:00pm.”*

48  
49  
50  
51 25 *“Went to meet a friend for coffee, exhausted after and needed to rest.”*

52  
53  
54 26 Socialising did not always reap the preconceived benefits and, on some occasions, served to  
55 27 make participants feel worse. This did not just exacerbate physical symptoms, but also  
56 28 presented mental and emotionally difficulties:



1  
2  
3 1 *“Taken to coffee but taking part in 1960s quiz very physically and mentally exhausted...  
4 failed miserably at quiz due to total brain fog... Went to bed again in the afternoon feeling  
5 very frustrated...”*  
6  
7  
8

9  
10 4 **Theme 3: Emotional Impact of Long COVID Symptoms on Personal Identity and  
11 Recovery**  
12

13 6 Another theme that came from the analysis was the emotions and thoughts of our participants,  
14 and the impact of this on their personal identity and long-term recovery (5% coverage). A range  
15 of negative emotions accompanied changes in symptomology and functional capacity:  
16  
17

18 9 *“Came home and had a soak in the bath which took an hour to get over after getting out  
19 muscles and joints aching. By late afternoon muscles and joints nerve aching from head to  
20 toe... I was sobbing with the pain.”*  
21  
22

23 12 *“Had bad night sleep, feeling anxious + teary this morning. Feel unable to attend study  
24 appointment due to feeling unwell so have rescheduled.”*  
25  
26

27 14 Emotions were accompanied with comparisons to healthy individuals around them which  
28 frequently led to negative sentiments and feelings of despair:  
29  
30

31 16 *“Was taken to church in the morning followed by a fund-raising coffee morning for  
32 Macmillan Cancer Research. It made me aware of how I am still physically and mentally  
33 “disabled” due to how quickly other non-Long COVID people moved about.”*  
34  
35

36 19 *“Sitting on the side-lines watching everyone else live.”*  
37  
38

39 20 Furthermore, participants would also compare themselves to their pre-infection state...:  
40  
41

42 21 *“Worried whether I will ever get back to pre Long COVID state.”*  
43  
44

45 22 *“Still ever present - the failing/knowledge that, without the sertraline, I would be in a little  
46 ball of depression. When will this end. Will I ever get my life back.”*  
47  
48

49 24 ...with changes in identity and emotional sensitivity since infection also reported:  
50  
51

52 25 *“I was made aware that I now have very little compassion or empathy- I'm not the same  
53 person.”*  
54  
55

56 27 *“I just know I'm not me anymore.”*  
57  
58  
59  
60

#### 4. Episodic and Undulating Nature of Long COVID

An area that underpinned all themes was the undulating nature of the post-COVID-19 journey and the interconnectivity of all themes. Participants often revealed that it was commonplace to experience a period of improvement followed by worsening of symptoms, day-by-day in some cases. However, this was often accompanied by comments regarding a correlated change in their QoL status and emotional state:

*“...sadly looks like another corner turned ☹. Energy levels even more. Craved carbs and chocolate.”*

*“Every day is a new day.”*

This was consistent across the 16-week period despite patients implementing management strategies, and it did not seem that patients became more expert at managing their condition.

However, the extended study period did reveal how seasonal weather changes may be somewhat, but not entirely, responsible for the episodic nature of the above themes:

*“Housebound [can't breathe cold air - Hurts] due to cold. Muscle and bones hurting a lot. Can't regulate body temperature. In a lot of pain”*

*“Feeling a lot better with it getting warmer but my body is aching.”*

#### DISCUSSION

To our knowledge, this is the first study to gather qualitative accounts over a longitudinal basis which highlights the day-to-day experiences of individuals living with Long COVID. The data highlights three key themes relating to: (1) understanding symptom management and the presentation of a broad symptom profile, (2) the impact upon QoL, health status and the role of pacing in managing functional tasks, (3) the effect of turbulent and episodic symptom profiles on personal identity and recovery.

Evidently, the biggest challenge associated with Long COVID is a broad and debilitating symptom profile[10]. Our work aligns with previous research that has identified the most prevalent symptom profiles associated with Long COVID[3, 8, 19, 20]. However, data here further outlines the integration of the symptoms with factors such as QoL status, and comparisons with healthy others and previous self, rather than considering these in isolation. For many participants, symptoms were managed by rest or sleep, which impacts their ability

1  
2  
3 1 to undertake activities of daily life (i.e., completing the school run or engaging in social  
4 activities). It was reported that when participants did attempt activities that are deemed low  
5 2 intensity this would exacerbate symptoms and lead to an extended period of convalescence.  
6 3 Accordingly, attempting to live with Long COVID requires considered support mechanisms  
7 4 that aim to help individuals understand changes in their physical, mental, and emotional health  
8 5 which is in line with an episodic symptom profile that is prone to exacerbation. A further  
9 6 consideration is to understand the episodic nature of Long COVID. Participants here reported  
10 7 perceived improvements in symptom severity, often referring to '*turning a corner*', however,  
11 8 this could change instantaneously and without any provocation in some cases, a finding that  
12 9 has been recognised in other studies[8, 13, 14, 21]. It has been suggested that patients with  
13 10 chronic diseases will increase activities when they feel able but with little consideration of the  
14 11 consequences[22]. However, this does not align with our data which is better associated with  
15 12 the findings of Humphreys et al.[23] who report that Long COVID patients prioritise a sense  
16 13 of normality and control over relapse. Our findings indicate that pacing advice of activities  
17 14 seems to have become more widespread and useful through Long COVID clinics and television  
18 15 programmes since this work, yet specific guidelines are still scarce. As such, further research  
19 16 is required to document changes in symptom profile relative to increased volume and intensity  
20 17 of activity.  
21 18

22 19 Data here supports that of Davis et al.[8], who highlighted disparate recovery profiles that  
23 20 failed to reach a resolution 7 months post-infection, thus highlighting the individual nature and  
24 21 the need for tailored approaches[9]. The broad and complex symptom profile of Long COVID  
25 22 makes it hard for health workers, family, and friends to fully understand the realities of living  
26 23 with a debilitating and unpredictable condition[11]. Our data extend this understanding by  
27 24 demonstrating that multiple stakeholders are often involved in the Long COVID journey, which  
28 25 is representative of the multidimensional and complex presentation of this condition. Boix et  
29 26 al.[24] reported that many people with Long COVID have unfortunately struggled to have their  
30 27 condition recognised. Patients have therefore felt isolated and resulted to self-treatment  
31 28 methods given the lack of knowledge, understanding, and bespoke treatments available for  
32 29 their condition and, in some instances, this has served to deteriorate, rather than ameliorate,  
33 30 their health[25, 26].

34  
35 31 Following critical illness, it can be commonplace to experience a range of difficult emotions  
36 32 and periods of stress which can manifest in the form of feeling tearful, lack of appetite, and  
37 33 difficulty sleeping[27]. Houben-Wilke and colleagues[28] demonstrate that negative emotions

1 (i.e., post-traumatic stress disorder, anxiety, and depression) persist in some Long COVID  
2 patients 3 and 6 months after the onset of COVID-19 symptoms, with a prevalence comparable  
3 between hospitalised and non-hospitalised patients. Our data indicates in a non-hospitalised  
4 cohort that these emotions are frequently borne out of symptomology, however, comparisons  
5 to healthy individuals and pre-infection states are centred at the heart of these thought  
6 processes. Houben-Wilke et al.[28] cited a lack of care and unmet needs as factors that  
7 contribute to negative emotions, however, future support services must incorporate methods to  
8 support grief due to loss of identity and purpose which is prominent amongst Long COVID  
9 patients. For example, meaning development, art therapies, and journaling advanced by the  
10 Four Phase Model[29] are proposed to be especially useful in grief management for ME/CFS  
11 patients. Further research is needed to deepen the understanding and integration between  
12 physical, mental, and emotional support mechanisms.

13 Research surrounding the treatment and management of Long COVID is of international  
14 interest, however, there is limited evidence that repurposing existing clinical interventions has  
15 efficacy in addressing the unique and complex pathological mechanisms that underpin Long  
16 COVID. Therefore, bespoke, adaptive, flexible, interdisciplinary, and patient centred  
17 approaches are needed to support individuals with Long COVID[30-32]. This is in keeping  
18 with one of our main findings which was the broad and undulating symptom profile reported  
19 by participants. Macpherson et al.[33] suggest services to support patients could take the form  
20 of 'one-stop' clinics in hospitals to treat patients holistically alongside established  
21 multidisciplinary departments. However, time to access support presented one of the biggest  
22 challenges to our participants, and if 'one-stop' clinics cannot support demand then patients  
23 may refer to potentially harmful self-treatment methods that will exacerbate symptoms.  
24 Therefore, whilst 'one-stop' multidisciplinary approaches offer a potential solution, the  
25 complex clinical presentation with patient settings may be better suited to a detailed and  
26 expansive service that is underpinned by a comprehensive screening process that directs  
27 patients to the required services which act in a 'buffet style system' where patients can access  
28 (in both volume and intensity) services they require to positively influence clinical outcomes.

29 Multidisciplinary collaboration has been recommended as an approach for Long COVID  
30 support[3, 34], and recent NHS policy[35] has set out to drive multi-disciplinary team working  
31 for those living with chronic health conditions which been effective in significantly improving  
32 cancer care[36]. However, given the nature of multidisciplinary teams (i.e., lack of interaction  
33 and unison between members), it is postulated that this would have limited patient benefit[3].

1  
2  
3 1 Alternatively, Tremblay et al.[37] found that cancer patients under the care of teams working  
4 with a greater interdisciplinary intensity reported four times greater access to care compared to  
5 2 lower intensity teams; access which our participants reported as a major difficulty.  
6 3  
7 4 Furthermore, Veronese et al.[38] found improvements in surgery waiting times through  
8 5 interdisciplinary teamwork even when factoring in socioeconomic barriers in upper-middle  
9 6 income countries. Therefore, facilitating access through a 'buffet-style' approach in an  
10 7 interdisciplinary manner should ensure greater access to, and equity of, care.  
11  
12 8 Faghy and colleagues[3] suggest an interdisciplinary approach embedded in systems science  
13 9 may better help identify key stakeholders that can assist in the design, delivery and evaluation  
14 10 of support services. This will be vital given the prevalence of Long COVID[6] combined with  
15 11 a chronically under-resourced and understaffed NHS[39]. A group of stakeholders that could  
16 12 ease a growing clinical burden is clinical exercise specialists whose expertise can design and  
17 13 deliver holistic support programmes that recognises the individual and broad symptom profile.  
18 14 These professionals can develop and implement holistic support mechanisms that are tailored  
19 15 to the individual and whose expertise is not limited to the prescription of physical activity and  
20 16 exercise[30, 32]. Furthermore, working in an interdisciplinary manner with a broad spectrum  
21 17 of other rehabilitation experts inclusive of physical, lifestyle, behavioural, and wellbeing  
22 18 practitioners would ensure other patient care needs are effectively supported. However, to be  
23 19 effective, it is important the lived experience is captured and incorporated into the entirety of  
24 20 the process to ensure the co-design and delivery of services address patient needs, are safe, and  
25 21 are accepted by Long COVID patients[40]. For example, it is widely acknowledged that key  
26 22 triggers (physical, cognitive, and emotional) can prompt post-exertional symptom exacerbation  
27 23 and/or relapse[8], which could explain why previous attempts to re-purpose existing clinical  
28 24 interventions for Long COVID services have not been accepted and in some cases have been  
29 25 damaging (i.e., the prescription of physical activity and graded exercise therapy)[41-43]. Early  
30 26 indications of the effectiveness of a personalised approach have been positive[44], however,  
31 27 these lack the involvement of the patient experiences in the design and testing process and so  
32 28 also risk rejection if not suitable in the applied setting. Gorna et al.[12] propose that an approach  
33 29 involving an individualised physical assessment by physicians with medical expertise to  
34 30 identify organ and multisystem dysfunction is also needed. This could then inform  
35 31 individualised and wider rehabilitation/support plans that will also be inclusive of other key  
36 32 stakeholders (i.e., employers when employees are returning to work). However, broad  
37 33 representation must be a key consideration in future work to ensure robust advice is provided,  
38  
39  
40  
41  
42  
43  
44  
45  
46  
47  
48  
49  
50  
51  
52  
53  
54  
55  
56  
57  
58  
59  
60

1  
2  
3 1 and the inclusion of the lived experience of minority groups with Long COVID also needs to  
4  
5 2 be better understood.  
6

7 3 A limitation of COVID-19 research, inclusive of our work, is the lack of ethnic diversity, male  
8  
9 4 representation, young people, low socioeconomic groups, and small sample sizes[8, 21, 33, 45-  
10  
11 5 47]. Long COVID has a tendency to present more commonly in females than males[48],  
12  
13 6 however, ethnic minorities have been disproportionately affected by the COVID-19  
14  
15 7 pandemic[49-51]. A recent report by the National Institute for Health Research showed that  
16  
17 8 the latter group constituted only 9% of cohorts in COVID-19 studies conducted in the UK. This  
18  
19 9 is despite ethnic minorities constituting 14% of the general population in the UK[52]. Current  
20  
21 10 barriers to taking part in COVID-19 research have been postulated to include access to health  
22  
23 11 services, language, and mistrust[45-47, 53, 54]. Gopal and colleagues[54] explain that existing  
24  
25 12 equality and diversity recommendations to tackle these barriers (i.e., cultural competency  
26  
27 13 training) have the potential to do more harm than good through ethnocentrism and stereotyping.  
28  
29 14 Instead, they recommend that a Cultural Safety approach engrained within a deep medicine  
30  
31 15 ideology would be most appropriate. By focusing on the individual experience of care, staff  
32  
33 16 self-reflexivity, and structural reflexivity, Gopal et al.[54] postulate deep medicine would help  
34  
35 17 overcome barriers such as mistrust and, subsequently, may help facilitate researcher-participant  
36  
37 18 relationships in future research[55, 56]. Developing rapport by establishing and aligning with  
38  
39 19 key principles valued by patients and reflecting with peers that challenge our own biases are  
40  
41 20 just a couple of key examples of how future studies may look to develop trust and provide a  
42  
43 21 safe, reassuring environment for ethnic minorities. This would be especially valuable in  
44  
45 22 observational studies such as our own that require participant engagement over a prolonged  
46  
47 23 period.  
48

49 24 A merit of using diary methodology was how it enabled participants to reveal nuance  
50  
51 25 experiences of their lives that, in the presence of a researcher, may not be easily recalled. For  
52  
53 26 example, one participant reported crying as she did not have the energy to see her husband in  
54  
55 27 hospital (Appendix A.) The emotional cost of reliving a new way of living at a predetermined  
56  
57 28 moment in-person may have been substantial where other energy requirements such as travel,  
58  
59 29 conversation, and sustained questioning may drain participant energy levels; unlike diary  
60  
61 30 entries which could be completed at any time that was convenient to participants. However,  
62  
63 31 quotes alike to this one lacked important detail which otherwise may have been explored with  
64  
65 32 other research methodologies. For example, interviews would have been better suited to  
66  
67 33 explore the source of self-treatment options.



## 1 CONCLUSIONS

2 This study has added to a growing body of literature in sharing the lived experience of Long  
3 COVID from the perspective of the patients. Over 16 weeks, our work recognised the broad,  
4 disabling, and episodic symptom profile of people living with Long COVID. It is vital more is  
5 done to support an already isolated group in a manner that not only provides validation to the  
6 Long COVID patient, but also a specific and adaptive support system that addresses the milieu  
7 of symptoms and undulating nature synonymous with Long COVID.

8  
9  
10  
11  
12  
13  
14  
15  
16  
17  
18  
19  
20  
21  
22  
23  
24  
25  
26  
27  
28  
29  
30  
31  
32  
33  
34  
35  
36  
37  
38  
39  
40  
41  
42  
43  
44  
45  
46  
47  
48  
49  
50  
51  
52  
53  
54  
55  
56  
57  
58  
59  
60

15 **Acknowledgements:** We would like to extend our sincere gratitude to our patients for their  
16 time, support, and development of our research on Long COVID.

17 **Competing interest:** No potential competing interest was reported by the authors.

18 **Funding:** This study was supported by an unrestricted investigator-sponsored research grant  
19 from Gilead Sciences (#IN-UK-983-6080).

20 **Contributorship Statement:** MAF and REA conceived the idea of the study. All partners (CT,  
21 MAF, RO, JY, FVF, TB, KH, & REA) were involved in recruitment and screening meanwhile  
22 CT, RO, and JY led data collection. CT led data analysis and the writing of the manuscript, and  
23 all authors contributed to the development of the submitted manuscript and approved this  
24 before submission.

25 **Data sharing statement:** Anonymised data can be made available on request.

26 **Ethics Approval Statement:** Ethical approval (IRAS ID: 292920) was granted by the Health  
27 Research Authority (HRA) and Health and Care Research Wales (HCRW).



## 1 REFERENCES

1. Collie, S., et al., *Effectiveness of BNT162b2 Vaccine against Omicron Variant in South Africa*. New England Journal of Medicine, 2022. **386**(5): p. 494-496.
2. England, P., *New data show vaccines reduce severe COVID-19 in older adults*. 2021.
3. Faghy, M.A.O., Rebecca. Thomas, Callum. Yates, James. Ferraro, Francesco V. Skipper, Lindsay. Barley McMullen, Sarah. Brown, Darren A. Arena, Ross. Ashton, Ruth EM. , *Is Long COVID the next global health crisis?* Journal of Global Health, 2022.
4. WHO. *A clinical case definition of post COVID-19 condition by a Delphi consensus, 6 October 2021*. 2021 [22/07/2022]; Available from: [https://www.who.int/publications/i/item/WHO-2019-nCoV-Post\\_COVID-19\\_condition-Clinical\\_case\\_definition-2021.1](https://www.who.int/publications/i/item/WHO-2019-nCoV-Post_COVID-19_condition-Clinical_case_definition-2021.1).
5. ONS. *Prevalence of ongoing symptoms following coronavirus (COVID-19) infection in the UK: 7 July 2022*. 2022; Available from: <https://www.ons.gov.uk/peoplepopulationandcommunity/healthandsocialcare/conditionsanddiseases/bulletins/prevalenceofongoingsymptomsfollowingcoronaviruscovid19infectionintheuk/7july2022>.
6. Wulf Hanson, S., et al., *A global systematic analysis of the occurrence, severity, and recovery pattern of long COVID in 2020 and 2021*. medRxiv, 2022.
7. Perego, E., et al., *Why the Patient-Made Term 'Long Covid' is needed*. Wellcome Open Research, 2020. **5**: p. 224.
8. Davis, H.E., et al., *Characterizing long COVID in an international cohort: 7 months of symptoms and their impact*. EClinicalMedicine, 2021. **38**: p. 101019.
9. Faghy, M.A., et al., *COVID-19 patients require multi-disciplinary rehabilitation approaches to address persisting symptom profiles and restore pre-COVID quality of life*. Expert Rev Respir Med, 2022. **16**(5): p. 595-600.
10. Hayes, L.D., J. Ingram, and N.F. Sculthorpe, *More Than 100 Persistent Symptoms of SARS-CoV-2 (Long COVID): A Scoping Review*. Front Med (Lausanne), 2021. **8**: p. 750378.
11. Brown, D.A. and K.K. O'Brien, *Conceptualising Long COVID as an episodic health condition*. BMJ Glob Health, 2021. **6**(9).
12. Gorna, R., et al., *Long COVID guidelines need to reflect lived experience*. Lancet, 2021. **397**(10273): p. 455-457.
13. Callan, C., et al., *'I can't cope with multiple inputs': a qualitative study of the lived experience of 'brain fog' after COVID-19*. BMJ Open, 2022. **12**(2): p. e056366.
14. Witvliet, M.G., *My 15-month rollercoaster ride with COVID-19: A social epidemiologist's perspective*. Scand J Public Health, 2022. **50**(1): p. 1-3.
15. Roulin, M.J., S. Hurst, and R. Spirig, *Diaries written for ICU patients*. Qual Health Res, 2007. **17**(7): p. 893-901.
16. Sansone, V., et al., *Narrative Diaries in Pediatrics: A Scoping Review*. J Pediatr Nurs, 2021. **59**: p. e93-e105.
17. Britton, C. and A. Moore, *Views from the Inside, Part 1: Routes to Diagnosis — Families' Experience of Living with a Child with Arthritis*. British Journal of Occupational Therapy, 2002. **65**(8): p. 374-380.
18. Chaturvedi, R., et al., *COVID-19 complications in males and females: recent developments*. J Comp Eff Res, 2022. **11**(9): p. 689-698.
19. Aiyegbusi, O.L., et al., *Symptoms, complications and management of long COVID: a review*. Journal of the Royal Society of Medicine, 2021. **114**(9): p. 428-442.
20. Raveendran, A.V., R. Jayadevan, and S. Sashidharan, *Long COVID: An overview*. Diabetes Metab Syndr, 2021. **15**(3): p. 869-875.
21. Ladds, E., et al., *Persistent symptoms after Covid-19: qualitative study of 114 "long Covid" patients and draft quality principles for services*. BMC Health Services Research, 2020. **20**(1).

1  
2  
3  
4  
5  
6  
7  
8  
9  
10  
11  
12  
13  
14  
15  
16  
17  
18  
19  
20  
21  
22  
23  
24  
25  
26  
27  
28  
29  
30  
31  
32  
33  
34  
35  
36  
37  
38  
39  
40  
41  
42  
43  
44  
45  
46  
47  
48  
49  
50  
51  
52  
53  
54  
55  
56  
57  
58  
59  
60

- 1 22. Burgoyne, R.W., et al., *Long-Term Quality-of-Life Outcomes Among Adults Living with HIV in the HAART Era: The Interplay of Changes in Clinical Factors and Symptom Profile*. *AIDS and Behavior*, 2004. **8**(2): p. 151-163.
- 2 23. Humphreys, H., et al., *Long COVID and the role of physical activity: a qualitative study*. *BMJ Open*, 2021. **11**(3): p. e047632.
- 3 24. Boix, V. and E. Merino, *Post-COVID syndrome. The never ending challenge*. *Med Clin (Engl Ed)*, 2022. **158**(4): p. 178-180.
- 4 25. Brown, K., et al., *Long COVID and self-management*. *Lancet*, 2022. **399**(10322): p. 355.
- 5 26. Davies, M., *Long covid patients travel abroad for expensive and experimental "blood washing"*. *BMJ*, 2022: p. o1671.
- 6 27. NHS. *Cognitive and emotional effects of recovering from COVID-19*. n.d 18/08/2022]; Available from: <https://www.cuh.nhs.uk/our-services/neuropsychology/guide-cognitive-and-emotional-effects-recovering-covid-19/>.
- 7 28. Houben-Wilke, S., et al., *The Impact of Long COVID-19 on Mental Health: Observational 6-Month Follow-Up Study*. *JMIR Mental Health*, 2022. **9**(2): p. e33704.
- 8 29. Fennell, P.A., N. Dorr, and S.S. George, *Elements of Suffering in Myalgic Encephalomyelitis/Chronic Fatigue Syndrome: The Experience of Loss, Grief, Stigma, and Trauma in the Severely and Very Severely Affected*. *Healthcare*, 2021. **9**(5): p. 553.
- 9 30. Ashton, R., et al., *COVID-19 and the long-term cardio-respiratory and metabolic health complications*. *Rev Cardiovasc Med*, 2022. **23**(2): p. 53.
- 10 31. Faghy, M.A., et al., *The need for exercise sciences and an integrated response to COVID-19: A position statement from the international HL-PIVOT network*. *Prog Cardiovasc Dis*, 2021. **67**: p. 2-10.
- 11 32. Faghy, M.A., et al., *Integrated sports and respiratory medicine in the aftermath of COVID-19*. *The Lancet Respiratory Medicine*, 2020. **8**(9): p. 852.
- 12 33. Macpherson, K., et al., *Experiences of living with long COVID and of accessing healthcare services: a qualitative systematic review*. *BMJ Open*, 2022. **12**(1): p. e050979.
- 13 34. Mishra, V., et al., *Health Inequalities During COVID-19 and Their Effects on Morbidity and Mortality*. *J Healthc Leadersh*, 2021. **13**: p. 19-26.
- 14 35. NHS. *NHS People Plan*. 2020 [cited 2023 13/02/2023]; Available from: <https://www.england.nhs.uk/ournhspeople/>.
- 15 36. Taberna, M., Moncayo, FG., Jané-Salas, E., Antonio, M., Arribas, L., Vilajosana, E., Torres, EP., & Mesía, R., *The Multidisciplinary Team (MDT) Approach and Quality of Care*. *Frontiers in oncology*, 2020. **10**(85).
- 16 37. Tremblay, D., et al., *Effects of interdisciplinary teamwork on patient-reported experience of cancer care*. *BMC Health Services Research*, 2017. **17**(1).
- 17 38. Veronese, E.T., P.M.A. Pomerantzeff, and F.B. Jatene, *Improving the heart team: An interdisciplinary team and integrated practice unit*. *World Journal of Cardiology*, 2021. **13**(12): p. 650-653.
- 18 39. Oliver, D., *David Oliver: The NHS's understaffing is its Achilles' heel*. *BMJ*, 2017. **357**: p. j2192.
- 19 40. Sivan, M., et al., *Long COVID Multidisciplinary consortium Optimising Treatments and services across the NHS (LOCOMOTION): protocol for a mixed-methods study in the UK*. *BMJ open*, 2022. **12**(5): p. e063505.
- 20 41. D'Souza, A.F., *Long COVID: implications for physiotherapy*. *European Journal of Physiotherapy*, 2021. **23**(6): p. 384-384.
- 21 42. Decary, S., et al., *Humility and Acceptance: Working Within Our Limits With Long COVID and Myalgic Encephalomyelitis/Chronic Fatigue Syndrome*. *J Orthop Sports Phys Ther*, 2021. **51**(5): p. 197-200.
- 22 43. Vink, M. and A. Vink-Niese, *The Updated NICE Guidance Exposed the Serious Flaws in CBT and Graded Exercise Therapy Trials for ME/CFS*. *Healthcare (Basel)*, 2022. **10**(5).

- 1  
2  
3 1 44. Yong, S.J., *Long COVID or post-COVID-19 syndrome: putative pathophysiology, risk factors, and*  
4 2 *treatments*. *Infectious Diseases*, 2021. **53**(10): p. 737-754.  
5 3 45. Chastain, D.B., et al., *Racial Disproportionality in Covid Clinical Trials*. *New England Journal of*  
6 4 *Medicine*, 2020. **383**(9): p. e59.  
7 5 46. Etti, M., et al., *Ethnic minority and migrant underrepresentation in Covid-19 research: Causes*  
8 6 *and solutions*. *EclinicalMedicine*, 2021. **36**: p. 100903.  
9 7 47. Sirotych, E. and J.S. Hausmann, *Removing barriers and disparities in health: lessons from the*  
10 8 *COVID-19 pandemic*. *Nature Reviews Rheumatology*, 2021. **17**(3): p. 125-126.  
11 9 48. Sylvester, S.V., et al., *Sex differences in sequelae from COVID-19 infection and in long COVID*  
12 10 *syndrome: a review*. *Curr Med Res Opin*, 2022: p. 1-9.  
13 11 49. Jaljaa, A., et al., *Risk of SARS-CoV-2 infection in migrants and ethnic minorities compared with*  
14 12 *the general population in the European WHO region during the first year of the pandemic: a*  
15 13 *systematic review*. *BMC Public Health*, 2022. **22**(1).  
16 14 50. Kirby, T., *Evidence mounts on the disproportionate effect of COVID-19 on ethnic minorities*.  
17 15 *The Lancet Respiratory Medicine*, 2020. **8**(6): p. 547-548.  
18 16 51. Tai, D.B.G., et al., *Disproportionate Impact of COVID-19 on Racial and Ethnic Minority Groups*  
19 17 *in the United States: a 2021 Update*. *Journal of Racial and Ethnic Health Disparities*, 2021.  
20 18 52. NIHR. *NIHR research ethnicity data provides insight on participation in COVID-19 studies*  
21 19 *[Internet]*. . 2020 04/06/2022]; Available from: [https://www.nihr.ac.uk/news/nihr-research-](https://www.nihr.ac.uk/news/nihr-research-ethnicity-data-provides-insight-on-participation-in-covid-19-studies/26460)  
22 20 [ethnicity-data-provides-insight-on-participation-in-covid-19-studies/26460](https://www.nihr.ac.uk/news/nihr-research-ethnicity-data-provides-insight-on-participation-in-covid-19-studies/26460).  
23 21 53. Enria, L., et al., *Power, fairness and trust: understanding and engaging with vaccine trial*  
24 22 *participants and communities in the setting up the EBOVAC-Salone vaccine trial in Sierra*  
25 23 *Leone*. *BMC Public Health*, 2016. **16**(1).  
26 24 54. Gopal, D.P., et al., *Reflexivity, Cultural Safety, and improving the health of racially minoritised*  
27 25 *communities*. *The Lancet*, 2022. **399**(10335): p. 1581-1582.  
28 26 55. Diallo, B.A., et al., *Clinical research on COVID-19: perceptions and barriers to participation in*  
29 27 *The Gambia*. *BMJ Global Health*, 2022. **7**(2): p. e007533.  
30 28 56. Schmotzer, G.L., *Barriers and facilitators to participation of minorities in clinical trials*.  
31 29 *Ethnicity & Disease*, 2012. **22**(2): p. 226-30.  
32  
33  
34  
35  
36  
37  
38  
39  
40  
41  
42  
43  
44  
45  
46  
47  
48  
49  
50  
51  
52  
53  
54  
55  
56  
57  
58  
59  
60

1  
2  
3 **1 APPENDICES**  
4

5 **2 Appendix A – Theme 1 additional quotes:**  
6

7 3 *“Struggled to get up/ fatigue. Short of breath. Tinnitus horrendous every day. sore throat.*

8 4 *Cannot sleep. Lymph nodes swollen Clavicle/ underarm. Aching like I have the flu.”*  
9

10  
11 5 *“Feeling exhausted had a steady day out with my hubby and he did all of the driving.”*  
12

13  
14 6 *“Felt really drained and lacking energy again. Slept for a short time at lunchtime. Cried*  
15 *because I was so tired, I didn't have the energy to drive to hospital to visit husband. Got son*  
16 *to take me.”*  
17 8

18  
19  
20 9 *“Sunday funday. Cinema with son. It was the best day of his life. Mean so very much to hear*  
21 *and see him enjoy himself. Had to be up early to get there so slept in car on way home in*  
22 *traffic.”*  
23 11  
24  
25  
26  
27  
28  
29  
30  
31  
32  
33  
34  
35  
36  
37  
38  
39  
40  
41  
42  
43  
44  
45  
46  
47  
48  
49  
50  
51  
52  
53  
54  
55  
56  
57  
58  
59  
60

## ID bmjopen-2020-041038 SRQR Checklist

|                                                    | Item                                                                                                                                                                                                                                                                                                                                                                                                 | Page         |
|----------------------------------------------------|------------------------------------------------------------------------------------------------------------------------------------------------------------------------------------------------------------------------------------------------------------------------------------------------------------------------------------------------------------------------------------------------------|--------------|
| <b>Title</b>                                       | Item 1. Title: Concise description of the nature and topic of the study. Identifying the study as qualitative or indicating the approach (e.g., ethnography, grounded theory) or data collection methods (e.g., interview, focus group) is recommended.                                                                                                                                              | page 1       |
| <b>Abstract</b>                                    | Item 2. Abstract: Summary of key elements of the study using the abstract format of the intended publication; typically includes background, purpose, methods, results, and conclusions.                                                                                                                                                                                                             | page 2       |
| <b>Problem Formulation</b>                         | Item 3. Problem Formulation: Description and significance of the problem/phenomenon studied; review of relevant theory and empirical work; problem statement.                                                                                                                                                                                                                                        | pages 3-4    |
| <b>Purpose or research question</b>                | Item 4. Purpose or research question: Purpose of the study and specific objectives or questions.                                                                                                                                                                                                                                                                                                     | page 4       |
|                                                    | Item 5. Qualitative approach and research paradigm: Qualitative approach (e.g., ethnography, grounded theory, case study, phenomenology, narrative research) and guiding theory if appropriate; identifying the research paradigm (e.g., post-positivist, constructivist/interpretivist) is also recommended; rationale                                                                              | pages 2, & 6 |
|                                                    | Item 6. Researcher characteristics and reflexivity: Researchers' characteristics that may influence the research, including personal attributes, qualifications/experience, relationship with participants, assumptions, and/or presuppositions; potential or actual interaction between researchers' characteristics and the research questions, approach, methods, results and/or transferability. | page 5       |
| <b>Context</b>                                     | Item 7. Context: Setting/site and salient contextual factors; rationale.                                                                                                                                                                                                                                                                                                                             | pages 2 & 5  |
| <b>Sampling strategy</b>                           | Item 8. Sampling strategy: How and why research participants, documents, or events were selected; criteria for deciding when no further sampling was necessary (e.g., sampling saturation); rationale.                                                                                                                                                                                               | page 5       |
| <b>Ethical issues pertaining to human subjects</b> | Item 9. Ethical issues pertaining to human subjects: Documentation of approval by an appropriate ethics review board and participant consent, or explanation for lack thereof; other confidentiality and data security issues.                                                                                                                                                                       | page 5       |

|                                                     |                                                                                                                                                                                                                                                                                                                                                                                                               |                  |
|-----------------------------------------------------|---------------------------------------------------------------------------------------------------------------------------------------------------------------------------------------------------------------------------------------------------------------------------------------------------------------------------------------------------------------------------------------------------------------|------------------|
|                                                     | Item 10. Data collection methods: Types of data collected; details of data collection procedures including (as appropriate) start and stop dates of data collection and analysis, iterative process, triangulation of sources/methods, and modification of procedures in response to evolving study findings; rationale.                                                                                      | page 5           |
| <b>Data collection instruments and technologies</b> | Item 11. Data collection instruments and technologies: Description of instruments (e.g., interview guides, questionnaires) and devices (e.g., audio recorders) used for data collection; if/how the instrument(s) changed over the course of the study.                                                                                                                                                       | page 5           |
| <b>Units of study</b>                               | Item 12. Units of study: Number and relevant characteristics of participants, documents, or events included in the study; level of participation.                                                                                                                                                                                                                                                             | pages 5, 6 & 7.  |
| <b>Data processing</b>                              | Item 13. Data processing: Methods for processing data prior to and during analysis, including transcription, data entry, data management and security, verification of data integrity, data coding and anonymization / de-identification of excerpts.                                                                                                                                                         | page 5 & 6.      |
| <b>Data analysis</b>                                | Item 14. Data analysis: Process by which inferences, themes, etc. were identified and developed, including the researchers involved in data analysis; usually references a specific paradigm or approach; rationale.                                                                                                                                                                                          | page 6           |
| <b>Techniques to enhance trustworthiness</b>        | Item 15. Techniques to enhance trustworthiness: Techniques to enhance trustworthiness and credibility of data analysis,(e.g., member checking, triangulation, audit trail); rationale                                                                                                                                                                                                                         | page 5 & 6       |
| <b>Synthesis and interpretation</b>                 | Item 16. Synthesis and interpretation: Main findings (e.g., interpretations, inferences, and themes); might include development of a theory or model, or integration with prior research or theory.                                                                                                                                                                                                           | pages 2, 6 & 13. |
| <b>Links to empirical data</b>                      | Item 17. Links to empirical data: Evidence (e.g., quotes, field notes, text excerpts, photographs) to substantiate analytic findings.                                                                                                                                                                                                                                                                         | pages 7 – 13.    |
|                                                     | Item 18. Integration with prior work, implications, transferability, and contribution(s) to the field: Short summary of main findings, explanation of how findings and conclusions connect to, support, elaborate on, or challenge conclusions of earlier scholarship; discussion of scope of application/generalizability; identification of unique contribution(s) to scholarship in a discipline or field. | pages 13 -17.    |



1  
2  
3  
4  
5  
6  
7  
8  
9  
10  
11  
12  
13  
14  
15  
16  
17  
18  
19  
20  
21  
22  
23  
24  
25  
26  
27  
28  
29  
30  
31  
32  
33  
34  
35  
36  
37  
38  
39  
40  
41  
42  
43  
44  
45  
46  
47  
48  
49  
50  
51  
52  
53  
54  
55  
56  
57  
58  
59  
60

|                              |                                                                                                                                                 |               |
|------------------------------|-------------------------------------------------------------------------------------------------------------------------------------------------|---------------|
| <b>Limitations</b>           | Item 19. Limitations: Trustworthiness and limitations of findings                                                                               | pages 3 & 17. |
| <b>Conflicts of interest</b> | Item 20. Conflicts of interest: Potential sources of influence or perceived influence on study conduct and conclusions; how these were managed. | page 18.      |
| <b>Funding</b>               | Item 21. Funding: Sources of funding and other support; role of funders in data collection, interpretation, and reporting.                      | page 18.      |

For peer review only



# BMJ Open

## The lived experience of patients with Long COVID: a qualitative study in the UK.

|                                 |                                                                                                                                                                                                                                                                                                                                                                      |
|---------------------------------|----------------------------------------------------------------------------------------------------------------------------------------------------------------------------------------------------------------------------------------------------------------------------------------------------------------------------------------------------------------------|
| Journal:                        | <i>BMJ Open</i>                                                                                                                                                                                                                                                                                                                                                      |
| Manuscript ID                   | bmjopen-2022-068481.R2                                                                                                                                                                                                                                                                                                                                               |
| Article Type:                   | Original research                                                                                                                                                                                                                                                                                                                                                    |
| Date Submitted by the Author:   | 06-Apr-2023                                                                                                                                                                                                                                                                                                                                                          |
| Complete List of Authors:       | Thomas, Callum; University of Derby, College of Science and Engineering<br>Faghy, MARk; University of Derby,<br>Owen, Rebecca; University of Derby,<br>Yates, James; University of Derby<br>Ferraro, Francesco; University of Derby<br>Bewick, Tom; Burton NHS Foundation Trust<br>Haggan, Kate; Burton NHS Foundation Trust<br>Ashton, Ruth EM; University of Derby |
| <b>Primary Subject Heading</b>: | Public health                                                                                                                                                                                                                                                                                                                                                        |
| Secondary Subject Heading:      | Global health, Patient-centred medicine, Qualitative research, Rehabilitation medicine, Health services research                                                                                                                                                                                                                                                     |
| Keywords:                       | COVID-19, PUBLIC HEALTH, Public health < INFECTIOUS DISEASES                                                                                                                                                                                                                                                                                                         |
|                                 |                                                                                                                                                                                                                                                                                                                                                                      |

SCHOLARONE™  
Manuscripts



I, the Submitting Author has the right to grant and does grant on behalf of all authors of the Work (as defined in the below author licence), an exclusive licence and/or a non-exclusive licence for contributions from authors who are: i) UK Crown employees; ii) where BMJ has agreed a CC-BY licence shall apply, and/or iii) in accordance with the terms applicable for US Federal Government officers or employees acting as part of their official duties; on a worldwide, perpetual, irrevocable, royalty-free basis to BMJ Publishing Group Ltd ("BMJ") its licensees and where the relevant Journal is co-owned by BMJ to the co-owners of the Journal, to publish the Work in this journal and any other BMJ products and to exploit all rights, as set out in our [licence](#).

The Submitting Author accepts and understands that any supply made under these terms is made by BMJ to the Submitting Author unless you are acting as an employee on behalf of your employer or a postgraduate student of an affiliated institution which is paying any applicable article publishing charge ("APC") for Open Access articles. Where the Submitting Author wishes to make the Work available on an Open Access basis (and intends to pay the relevant APC), the terms of reuse of such Open Access shall be governed by a Creative Commons licence – details of these licences and which [Creative Commons](#) licence will apply to this Work are set out in our licence referred to above.

Other than as permitted in any relevant BMJ Author's Self Archiving Policies, I confirm this Work has not been accepted for publication elsewhere, is not being considered for publication elsewhere and does not duplicate material already published. I confirm all authors consent to publication of this Work and authorise the granting of this licence.

1 **Title: The lived experience of patients with Long COVID: a qualitative study in the UK.**

2 **Authors:** Callum Thomas<sup>1</sup>, Mark A Faghy<sup>1,2</sup>, Rebecca Owen<sup>1</sup>, James Yates<sup>1</sup>, Francesco V  
3 Ferraro<sup>1</sup>, Tom Bewick<sup>3</sup>, Kate Haggan<sup>3</sup>, Ruth EM Ashton<sup>1</sup>.

4 **Affiliations:**

- 5 1. School of Human Sciences, University of Derby, Derby, UK
- 6 2. Healthy Living for Pandemic Event Protection (HL – PIVOT) Network, Chicago, IL
- 7 3. Respiratory Medicine, University Hospitals of Derby and Burton NHS Foundation  
8 Trust, Derby, UK

9 **Corresponding Author:** Mr. Callum Thomas, Human Sciences Research Centre, University  
10 of Derby, England, UK. E: C.Thomas@Derby.ac.uk.

11 **Key Words:** Lived experience, COVID-19, Long COVID, Health and Wellbeing

## 1 **ABSTRACT**

2 *Background:* Long COVID is a rapidly evolving global health crisis requiring interdisciplinary  
3 support strategies that incorporate the lived experience of patients. Currently, there is a paucity  
4 of research documenting the day-to-day experiences of patients living with Long COVID.

5 *Objective:* To explore the lived experience of Long COVID patients.

6 *Study design:* Longitudinal, observation study.

7 *Setting:* An inductive, data-driven, qualitative approach was used to evaluate hand-written  
8 diaries obtained from individuals who had been referred to a Derbyshire Long COVID clinic.

9 *Participants:* 12 participants (11 females, age  $49 \pm 10$  years, 11 Caucasians) were recruited.  
10 Participants were included if they had a previous confirmed or suspected COVID-19 infection  
11 with ongoing recovery, >18 years old, understood the study requirements and provided  
12 informed consent.

13 *Method:* Participants were directed to complete self-report diaries over 16 weeks. Responses  
14 were transcribed verbatim and analysed using thematic analysis.

15 *Results:* Three key themes were highlighted; (1) understanding who helps patients manage  
16 symptoms, (2) daily activities and the impact upon quality of life and health status, and (3) the  
17 effect of turbulent and episodic symptom profiles on personal identity and recovery.

18 *Conclusions:* The novel challenges presented by Long COVID are complex with varying  
19 interrelated factors that are broadly impacting functional status and quality of life. Support  
20 mechanisms must incorporate the lived experiences and foster true collaborations between  
21 health professionals, patients, and researchers to improve patient outcomes.

22 *Trial registration:* NCT04649957.

## STRENGTHS AND LIMITATIONS OF THE STUDY

- Self-report diaries are flexible and adaptable methods that allow participants to record their feelings and lived experiences at their convenience.
- The diaries allowed participants to open up and reveal nuanced details that, in the presence of a researcher, may not have been documented.
- The diaries allowed participants to document their experiences over time rather than at predetermined moments where they may not have been prepared physically or emotionally to answer.
- Participants were instructed to use the diaries freely and so entries were not made every day by some participants.

## INTRODUCTION

Over the time-course of the Coronavirus pandemic 2019 (COVID-19), international attention has predominantly focused on addressing the impact of acute infection. Thanks to effective and widespread vaccination this has undoubtedly reduced the severity of acute infections, observed by a reduction in hospitalisations and mortality[1, 2]. As such the focus has now shifted to restoring social and economic activities. Despite a shift in focus, we are still very much amid a pandemic that is demonstrating a lasting impact on public health[3]. Whilst vaccines reduce the likelihood of severe patient outcomes, it is established that vaccines do not prevent transmission or infection with SARS-COV-2 and they offer minimal protection against post-viral issues and symptom profiles, commonly referred to as Long COVID.

Defined by the World Health Organisation as '*individuals with probable or confirmed COVID-19 diagnosis presenting symptoms 3 months after symptom onset, and symptoms lasting at least 2 months that cannot be explained by an alternative diagnosis*'[4]. Recent statistics estimate that >2 million people in the United Kingdom (UK)[5] and 144.7 million globally[6] are living with long-term and debilitating symptom profiles of Long COVID[7]. The complex and episodic symptom profile is at the forefront of mechanistic investigations to increase pathological insight. Reports highlight the extent of physical, cognitive, and psychosocial symptoms (i.e., fatigue, brain fog, and anxiety) and the impact upon multiple bodily systems (i.e., cardiovascular, respiratory, and pulmonary system) that is becoming established[8-10] Davis et al.[8] identified three symptom clusters that have distinct temporal profiles, cluster 1 identified early symptoms that peak and then diminish (i.e., runny nose, loss of appetite, fever), cluster 2 represented stable symptoms (i.e., nausea, chest tightness, fatigue), meanwhile cluster

1  
2  
3 1 3 represented symptoms that initially increase sharply then either plateau or slightly increase  
4 2 or decrease over the following months (i.e., palpitations, brain fog, post-exertional malaise)[8].  
5 3 Another aspect reported via an online survey of Long COVID is the episodic nature of  
6 4 symptoms[11] with 86% of participants (n= 3,252, 95% Confidence Interval (CI), 84.8% to  
7 5 87.0%) having symptoms triggered or exacerbated by physical or mental activities[8].  
8  
9  
10 6 Recent data suggest that 1 in 10 positive SARS-CoV-2 infections will go on to experience long-  
11 7 term illness[8]. There is an unquestionable need to increase the pathological understanding to  
12 8 inform the design and development of bespoke and safe support services and pharmacological  
13 9 interventions for Long COVID patients. However, given the unique nature of COVID-19 and  
14 10 Long COVID, there is a need to engage the intended stakeholders and learn from the  
15 11 experiences of those living with this condition. Despite repeated calls from patients to  
16 12 incorporate the lived experience as a prominent feature in the design and implementation of  
17 13 research[12], there remains a lack of detail that provides thorough longitudinal insight from  
18 14 patients. Callan et al.[13] recognised the relapsing-remitting time course of Long COVID as  
19 15 an ‘episodic disability’ whereby participants reported brain fog that aligned with the  
20 16 unpredictable wellness and illness previously described in HIV-positive patients. However, the  
21 17 focus groups were followed up 4-6 months later by email and similarly provide a snapshot  
22 18 summary to that of online surveys. Witvliet[14] retrospectively revealed the details of her  
23 19 personal Long COVID journey which included nuanced details that would not be captured in  
24 20 clinical pathways. This detail could provide important insight to support clinical decision  
25 21 making but also in the development of Long COVID support pathways that are relevant,  
26 22 accepted, and lead to improved patient outcomes. Patient diaries have previously been used in  
27 23 intensive care units (ICU) and are useful tools to document patients’ lived experiences[15, 16].  
28 24 Diaries are flexible and adaptable tools that can be used anytime and away from face-to-face  
29 25 research and clinical settings[16] which can bridge the gap in communication between patients  
30 26 and healthcare providers[17]. Diaries can allow Long COVID patients to remember their  
31 27 experiences independent of recall bias and without eliciting emotional difficulty that is brought  
32 28 about with an in-person consultation. However, the use of diaries in documenting the day-to-  
33 29 day lived experience of individuals with Long COVID is not commonplace and there is a  
34 30 paucity of data obtained that documents the longitudinal lived experience which is important  
35 31 in the design and development of specific support mechanisms[12]. Accordingly, this study  
36 32 sought to capture the lived experience of individuals with Long COVID taking part in a 16-  
37 33 week observational study collected via hand-written diaries.

## 1 **METHODS**

2 Following NHS research ethics approval (IRAS ID: 292920) and informed consent, qualitative  
3 accounts of the lived experience of 12 Long COVID participants were recorded via diaries over  
4 16 weeks. Previous post-viral research and the paucity of SARS-CoV-2 infection recovery  
5 information influenced the study design rationale of 16 weeks; however, we acknowledge  
6 current recovery time extends beyond this significantly. The diaries formed part of a larger  
7 observational study powered by sample analysis techniques of individuals recovering at home  
8 from a SARS-CoV-2 infection. The sample presented here was a sub-sample of patients that  
9 completed the study. Data from the diaries were monitored continuously and analysed until  
10 saturation[18]. At saturation, 17 participants had completed their involvement with 5  
11 participants choosing not to fill out their diaries. Reasoning for non-completion included  
12 memory loss, energy prioritisation, and depressive feelings towards diary use. Participants  
13 were recruited following a referral from an established Long COVID clinic where a participant  
14 information sheet and contact details were provided to obtain any further detail/clarifications.  
15 No time-limit was placed on participation decision. Following the request to participate in the  
16 study, participants were passed onto the research team for consenting. As part of the study  
17 procedures listed entirely at clinicaltrials.gov (NCT04649957), participants were provided with  
18 and directed to freely use a self-report diary, that was returned and photocopied monthly, to  
19 capture information that they deemed appropriate as part of their post-COVID-19 journey. This  
20 exploratory approach was appropriate given the lack of understanding of the lived Long  
21 COVID experiences, and a greater need to inform the development of bespoke support  
22 mechanisms.

### 23 **Researcher characteristics**

24 Researchers from the University of Derby had bimonthly contact with participants and  
25 instructed them to use diaries freely; this should have had limited impact on how they were  
26 used. All researchers had experience in their respective field of working with clinical  
27 populations with chronic conditions.

### 28 **Patient and Public Involvement and Engagement (PPIE) statement**

29 PPIE was a crucial part of the research design, implementation of the project, and interpretation  
30 of the resulting data reported in this manuscript. Previous research team experiences with  
31 pneumonia patients informed the data collection materials repurposed for this study.  
32 Participants were involved in raising awareness of our research to recruit participants in their



1 Long COVID networks and will also be involved in the dissemination of the results by sharing  
 2 the findings with their support groups and networks.

### 3 **Data analysis**

4 One researcher (CT, who had previous experience with interview transcriptions) transcribed  
 5 verbatim, coded, and thematically analysed full diaries using the qualitative software NVIVO  
 6 12 Pro (Version 12.7, QSR International, Doncaster, Australia). Alongside regular meetings,  
 7 diary transcriptions were checked for accuracy by other members of the research team (MAF,  
 8 REA, RO, JY, and FVF). An inductive, data-driven approach was adopted to code the data into  
 9 descriptive terms which were collated to produce 12 themes and 82 sub-themes and grouped  
 10 to generate three overarching themes. Two researchers (RO & JY, both with previous  
 11 qualitative research experience) then reviewed 50% of the transcripts each with the generated  
 12 themes and met with CT to confirm whether these were reflective of the presented data. These  
 13 findings were then shared with the remainder of the research team (MAF, REA, and FVF) and  
 14 with two patient representatives for review; no adjustments were requested, and the themes  
 15 were deemed reflective of the transcripts. Theme coverage was also generated by CT and  
 16 denoted the percentage reporting of the theme across all the diaries.

## 17 **RESULTS**

18 Participant characteristics are detailed in Table 1 and are coincidentally skewed in  
 19 representation towards white, middle-aged females, and are consistent with research in this  
 20 area[19]. Three key themes were identified: (1) *understanding who helps patients manage*  
 21 *symptoms, (2) daily activities and the impact upon quality of life and health status, and (3) the*  
 22 *effect of turbulent and episodic symptom profiles on personal identity and recovery.*

**Table 1:** Pooled participant pre-COVID, baseline and 16-week post-baseline measures (Mean  $\pm$  SD).

| Demographic Profile | Mean ( $\pm$ SD)            |
|---------------------|-----------------------------|
| Age (years)         | 49 $\pm$ 10                 |
| Sex                 | Male (N=1)<br>Female (N=11) |
| Ethnicity           | White British (N=11)        |

| Occupational Status                        |           | Employed Full Time (N=3)<br>Illness absence from work (N=8)<br>Retired (N=1) |          |          |
|--------------------------------------------|-----------|------------------------------------------------------------------------------|----------|----------|
| Index of Multiple Deprivation (IMD) Decile |           | 7 ± 3                                                                        |          |          |
| Performance Status                         | Pre-COVID | Baseline                                                                     | 16-weeks | P values |
| Overall health (AU)                        | 2 ± 0.9   | 4 ± 0.6                                                                      | 3 ± 0.8  | < 0.001  |
| COVID-19 Symptom rating (AU)               | -         | 8 ± 1                                                                        | 7 ± 2    | 0.324    |
| PCFS (AU)                                  | -         | 3 ± 0.4                                                                      | 2 ± 0.8  | 0.054    |
| Dyspnoea (AU)                              | -         | 3 ± 0.7                                                                      | 3 ± 0.8  | 1.000    |
| EQ5D-5L (AU)                               | -         | 13 ± 3                                                                       | 13 ± 5   | 0.575    |
| EQ5D-5L VAS (AU)                           | -         | 46 ± 16                                                                      | 47 ± 22  | 0.691    |

Overall health score: 1-5 scale (1 = very good and 5 = very bad). COVID-19 Symptom score: 0–10 rating of symptom effect on daily life (0 = no impact / symptoms and 10 = symptom/s have had a big effect). PCFS: 0–4 scale of functional status (0 = no limitations and 4 = severe limitations). Dyspnoea: 1-5 scale of breathlessness (1 = breathless only with strenuous exercise and 5 = too breathless to leave the house). EQ5D-5L involves rating subcategories of mobility, self-care, usual activities, pain/discomfort, and anxiety/depression on a 1-5 scale (1 = no problems and 5 = extreme problems or inability). EQ5D-5L VAS: 0-100 scale of perceived overall health (0 = worst health they can imagine and 100 the best health they can imagine). Overall health data only for retrospective pre-COVID evaluation. AU, Arbitrary Unit, PCFS, Post COVID Functional Status, VAS, Visual Analogue Score. P values are derived from paired samples t-tests.

## Theme 1: Understanding who helps Long COVID patients with symptom management

Symptom management received 66% coverage with 2,089/2911 references made to Long COVID symptoms. Furthermore, the broad and cyclical nature of symptoms highlights the day-to-day challenges associated with COVID-19 recovery:

*“... headache (lighter), aches/ pains in muscles/ joints, pains/ aches in chest, shortness of breath, brain pulsating, light ringing in ears. Thought I’d put the alarm on and I hadn’t, internal vibrations/pain in upper arms... kept losing focus in online training.”*

*“... went out for a meal with work for a couple of hours - felt good. Got home - symptoms returned intensely.”*

1  
2  
3 1 *“Pins and needles went yesterday evening. Arms feel wonderful again. No pins and needles*  
4 *in hand. Made such a difference to my mood today... Every day is a new day.”*  
5 2

6  
7  
8 3 Available support options

9  
10 4 Nine out of the twelve diaries made references relating to the awareness and availability of  
11 healthcare support to help participants cope with the challenges of living with Long COVID.  
12 5 There were regular suggestions that the services were unhelpful, underdeveloped, and slow:  
13 6

14 7 *“...neurology appointment came away disappointed and angry at lack of understanding...”*

15 8 *“Felt the doctor (as in GP) needs awareness raising more to Long COVID.”*

16 9 *“Chased Long COVID clinic been waiting since 25th June. Still, 2.5 months to wait at*  
17 *least!!”*  
18 10

19 11 In response to frustration at a lack of services, participants reported opting to try self-treatment  
20 12 methods with mixed results. These include self-prescribed vitamin supplementation or changes  
21 13 to diet:

22 14 *“Can feel the benefits of B 12 – less fatigue.”*

23 15 *“Still feel antihistamines and low histamine diet do help.”*

24 16 Other instances highlight that some experimental treatments resulted in symptom exacerbation:

25 17 *“...went to... oxygen centre for an intense therapy trial. Had to stop procedure after 15*  
26 18 *minutes due to intensifying chest pain and blurred vision”*

27 19 *“Oxygen therapy. extremely tired, confusion + brain”*

28 20 Despite this frustration, there was recognition that care services to appropriately support their  
29 21 needs are developing:

30 22 *“Occupational therapist through LC clinic really supportive/ helpful.”*

31 23 *“Now seen CF [Chronic fatigue] clinic and improving pacing”*

32 24 Furthermore, a doctor within an established Long COVID clinic was able to identify symptoms  
33 25 associated with a pulmonary embolism and was able to make a referral for further examination.

1  
2  
3 1 *“Very good referrals to fatigue clinic, breathing clinic, vocational rehab, blood tests, eye*  
4  
5 2 *checks. Go to A&E for blood clot check.”*  
6

7  
8 3 Family interdependence  
9

10 4 The role of the family as part of the lived experience was also repeatedly noted. However, akin  
11 to healthcare support services, the data provided mixed findings. For example, some  
12 5 participants were very dependent on family and the support provided was crucial to everyday  
13 6 life and functional activity:  
14 7

15 8 *“In a lot of pain after the walk, not comfortable going out without my wife support.”*  
16

17 9 *“Totally exhausted and hardly able to do anything, my husband is looking after me.”*  
18  
19

20 10 The diaries also revealed that participants played an important role in supporting their families,  
21 usually in the form of some sort of task or responsibility. This commonly served to exacerbate  
22 11 symptoms such as brain fog which had negative outcomes:  
23 12

24 13 *“Saw son + his girlfriend so cooked lunch for them - was fab to see them but wiped me out -*  
25 14 *everything ached and was shattered!!”*  
26

27 15 *“Stayed at sons for night to look after his dogs, flooded kitchen, (forgot I'd left tap on).”*  
28  
29

30 16 **Theme 2: Daily activities and the impact upon quality of life**  
31  
32

33 17 Symptoms were closely associated with QoL (29% coverage). This theme not only identified  
34 18 the impact on functional status and ability of participants to be physically active but also the  
35 19 numerous times they needed to recover and manage symptoms accordingly. Commonly  
36 20 reported symptoms of tiredness, fatigue, and exhaustion were often managed with recovery  
37 21 periods:  
38

39 22 *“...visit to see my Auntie. An exhausting day... genuine chest pain and tightness so sat*  
40 23 *down... my chest problems are worsening... exhausted so went upstairs straight away.”*  
41

42 24 *“Went to a church service, walked but it was very slow, tiring and cause chest tightness.*  
43 25 *Went and lay on the bed all of the afternoon. Couldn't remember how long I slept.”*  
44  
45

46 26 Regardless of whether recovery was acute (i.e., a quick nap on the sofa) or prolonged (i.e.,  
47 27 resting all day in bed), symptoms were not consistently alleviated, and it was commonplace for  
48 28 symptoms to persist and often become exacerbated:  
49  
50  
51  
52  
53  
54  
55  
56  
57  
58  
59  
60

1  
2  
3 1 *“Rested from 5pm - After a couple of hours symptoms intensified again. Had conversation*  
4  
5 2 *with a friend and kept forgetting simple words.”*  
6

7  
8 3 *“Rested all afternoon. Made tea / struggled to walk my dog. All symptoms intensified, unable*  
9  
10 4 *to do anything else, pains in muscles/joints particularly fingers/hands, forearms and elbows.*  
11 5 *Light headedness.”*  
12

### 13 Changes in functional ability and physical activity

14  
15  
16 7 Persistent symptomology also impacted routine functional activities that pre-COVID-19  
17  
18 8 infection would have likely taken less time and energy to complete. This ranged from difficulty  
19  
20 9 to concentrate during a task, as well as prolonging the length of time to complete that activity:

21  
22 10 *“...writing Christmas cards out of my mind. Completed them but it took three hours. It took*  
23  
24 11 *me three times longer than before I had Long COVID.”*  
25

26  
27 12 *“Took all day to Hoover and Polish”*  
28

29  
30  
31 13 The ability to exercise had also changed, with a few accounts of low volume cycling, or light  
32  
33 14 cross-trainer or treadmill activities reported. In most instances, targeted exercise for  
34  
35 15 participants was intolerable:

36  
37 16 *“The physios want me to continue the exercises at home but that is impossible for me to do.”*  
38

39  
40 17 *“Exercise but everything seems like one step forward and two steps [back]”*  
41

42  
43 18 There was a determination from participants to engage in physical activities. Walking was  
44  
45 19 frequently reported however was consistently linked with an exacerbation of symptoms:

46  
47 20 *“Try taking my dog for a walk... This was hard as my legs felt heavy and tired to move.”*  
48

49  
50 21 *“Walked 50 metres... very tiring and struggled with breathing on return journey.”*  
51

52  
53 22 Return to work was affected by Long COVID symptoms and some participants did not feel  
54  
55 23 prepared to resume their careers due to the physical and mental challenges of work:

56  
57 24 *“I am signed off work... still feel I would be unable to return to work at present (feel*  
58  
59 25 *concerned whether I will ever be able to [return to] my job as a community nurse as it is a*  
60 26 *mentally and physically demanding role).”*

27 However, participants who returned to work described the experience as a “fight”, while having

1  
2  
3 1 to manage the challenges of their symptoms alongside the financial pressures of having had an  
4  
5 2 extensive period of leave from work:

6  
7 3 *“Having to fight for every step as well as being ill.”*

8  
9  
10 4 *“Grief from work - half pay without notice.”*

11  
12  
13 5 Pacing as an activity management strategy

14  
15 6 A key facet in all activities was the role of pacing. Participants were often keen to be functional  
16  
17 7 and active, and pacing strategies helped them manage these activities:

18  
19 8 *“Very tired this evening but know I would be so tea out the freezer. Getting better on these*  
20  
21 9 *days. I'm not superhuman. I can pace.”*

22  
23  
24 10 *“Very tiring week... paced myself each day.”*

25  
26 11 Specifically, advice from other people sharing their experiences helped participants pace and  
27  
28 12 manage activities in their own lives:

29  
30 13 *“Interesting interview on Lorraine with Nick Knowles TV presenter. after having COVID and*  
31  
32 14 *wanting to get back into shape he returned to the gym and found exercised knocked him back*  
33  
34 15 *with recovery. Quite interesting I think, since I've eased off with my morning gym sessions, I*  
35  
36 16 *think it may be helping my recovery?”*

37  
38 17 Another finding was that participants could pace their activities feeling ok until they stopped,  
39  
40 18 thereafter symptoms were unbearable:

41  
42 19 *“Helped install CCTV system, wanted to do something normal [to] see how I got on. Lots of*  
43  
44 20 *breaks, pace myself, painkillers. Was OK until I stopped. Symptoms intensified immensely,*  
45  
46 21 *nine out of 10”*

47  
48  
49 22 Therefore, it does seem that there is a limit of tolerance on the extent to which pacing can help  
50  
51 23 during a particular activity, with education on the cumulative activity load across a time  
52  
53 24 needing to be established:

54  
55 25 *“Went to horse again and a walked at a steady pace with regular stops to get some fresh air.*  
56  
57 26 *Left ear still blocked, whooshing and earache, left arm still weak and unable to lift for long*  
58  
59 27 *without getting a cramping pain. Pain in feet and internal vibrations at night, still coughing*  
60  
60 28 *phlegm up and a cough...”*

### 1 Post-exertional symptom exacerbation

2 The symptom exacerbation following activities was widely reported; however, participants  
3 chose to still engage with certain activities despite knowing that symptoms would occur during  
4 or afterwards:

5 *“Went to a family wedding at 1:00pm. Very hard to make the effort but enjoyed seeing my*  
6 *nephew getting married. Had to leave early, was totally exhausted and went to bed at*  
7 *7:00pm.”*

8 *“Went to meet a friend for coffee, exhausted after and needed to rest.”*

9 Socialising did not always reap the preconceived benefits and, on some occasions, served to  
10 make participants feel worse. This did not just exacerbate physical symptoms, but also  
11 presented mental and emotionally difficulties:

12 *“Taken to coffee but taking part in 1960s quiz very physically and mentally exhausted...  
13 failed miserably at quiz due to total brain fog... Went to bed again in the afternoon feeling  
14 very frustrated...”*

### 15 **Theme 3: Emotional impact of Long COVID symptoms on personal identity and** 16 **recovery**

17 Another theme that came from the analysis was the emotions and thoughts of our participants,  
18 and the impact of this on their personal identity and long-term recovery (5% coverage). A range  
19 of negative emotions accompanied changes in symptomology and functional capacity:

20 *“Came home and had a soak in the bath which took an hour to get over after getting out*  
21 *muscles and joints aching. By late afternoon muscles and joints nerve aching from head to*  
22 *toe... I was sobbing with the pain.”*

23 *“Had bad night sleep, feeling anxious + teary this morning. Feel unable to attend study*  
24 *appointment due to feeling unwell so have rescheduled.”*

25 Emotions were accompanied with comparisons to healthy individuals around them which  
26 frequently led to negative sentiments and feelings of despair:



1  
2  
3  
4 1 *“Was taken to church in the morning followed by a fund-raising coffee morning for*  
5 2 *Macmillan Cancer Research. It made me aware of how I am still physically and mentally*  
6 3 *“disabled” due to how quickly other non-Long COVID people moved about.”*

8  
9 4 *“Sitting on the side-lines watching everyone else live.”*

11  
12 5 Furthermore, participants would also compare themselves to their pre-infection state...:

13  
14 6 *“Worried whether I will ever get back to pre Long COVID state.”*

15  
16  
17 7 *“Still ever present - the failing/knowledge that, without the sertraline, I would be in a little*  
18 8 *ball of depression. When will this end. Will I ever get my life back.”*

19  
20  
21 9 ...with changes in identity and emotional sensitivity since infection also reported:

22  
23  
24 10 *“I was made aware that I now have very little compassion or empathy- I'm not the same*  
25 11 *person.”*

26  
27  
28 12 *“I just know I'm not me anymore.”*

29  
30  
31 13 **4. Episodic and Undulating Nature of Long COVID**

32  
33 14 An area that underpinned all themes was the undulating nature of the post-COVID-19 journey  
34 15 and the interconnectivity of all themes. Participants often revealed that it was commonplace to  
35 16 experience a period of improvement followed by worsening of symptoms, day-by-day in some  
36 17 cases. However, this was often accompanied by comments regarding a correlated change in  
37 18 their QoL status and emotional state:

38  
39  
40 19 *“...sadly looks like another corner turned ☹. Energy levels even more. Craved carbs and*  
41 20 *chocolate.”*

42  
43  
44 21 *“Every day is a new day.”*

45  
46  
47 22 This was consistent across the 16-week period despite patients implementing management  
48 23 strategies, and it did not seem that patients became more expert at managing their condition.

49  
50  
51 24 However, the extended study period did reveal how seasonal weather changes may be  
52 25 somewhat, but not entirely, responsible for the episodic nature of the above themes:

1  
2  
3 1 “Housebound [can't breathe cold air - Hurts] due to cold. Muscle and bones hurting a lot.  
4  
5 2 Can't regulate body temperature. In a lot of pain”  
6  
7  
8 3 “Feeling a lot better with it getting warmer but my body is aching.”  
9

#### 10 4 **DISCUSSION**

11  
12 5 To our knowledge, this is the first study to gather qualitative accounts over a longitudinal basis  
13  
14 6 which highlights the day-to-day experiences of individuals living with Long COVID. The data  
15  
16 7 highlights three key themes relating to: (1) understanding who helps patients manage  
17  
18 8 symptoms, (2) daily activities and the impact upon QoL, health status, and the role of pacing  
19  
20 9 in managing functional tasks, (3) the effect of turbulent and episodic symptom profiles on  
21  
22 10 personal identity and recovery.

23  
24 11 Evidently, the biggest challenge associated with Long COVID is a broad and debilitating  
25  
26 12 symptom profile[10]. Our work aligns with previous research that has identified the most  
27  
28 13 prevalent symptom profiles associated with Long COVID[3, 8, 20, 21]. However, the diaries  
29  
30 14 further outline the integration of symptoms with factors such as QoL status, and comparisons  
31  
32 15 with healthy others and previous self, rather than considering these in isolation. For many  
33  
34 16 participants, symptoms were managed by rest or sleep, and the diaries allowed participants to  
35  
36 17 think more deeply about how this impacted their ability to undertake activities of daily life (i.e.,  
37  
38 18 completing the school run or engaging in social activities). It was reported that when  
39  
40 19 participants did attempt activities that are deemed low intensity this would exacerbate  
41  
42 20 symptoms and lead to an extended period of convalescence. Accordingly, attempting to live  
43  
44 21 with Long COVID requires considered support mechanisms that aim to help individuals  
45  
46 22 understand changes in their physical, mental, and emotional health which is in line with an  
47  
48 23 episodic symptom profile that is prone to exacerbation. A further consideration is to understand  
49  
50 24 the episodic nature of Long COVID. Participants here reported perceived improvements in  
51  
52 25 symptom severity, often referring to ‘*turning a corner*’; however, this could change  
53  
54 26 instantaneously and without any provocation in some cases, a finding that has been recognised  
55  
56 27 in other studies[8, 13, 14, 22]. It has been suggested that patients with chronic diseases will  
57  
58 28 increase activities when they feel able but with little consideration of the consequences[23].  
59  
60 29 However, this does not align with our data which is better associated with the findings of  
60 30 Humphreys et al.[24] who report that Long COVID patients prioritise a sense of normality and  
60 31 control over relapse. Our findings indicate that pacing advice seems to have become more  
60 32 widespread and useful through Long COVID clinics and television programmes since this

1  
2  
3 1 work. However, specific guidelines are still scarce and the diaries reveal detailed examples of  
4  
5 2 how even sensible pacing strategies can result in ineffective outcomes. As such, further  
6  
7 3 research is required to document changes in symptom profile relative to increased volume and  
8  
9 4 intensity of activity to help better inform pacing advice.

10  
11 5 Our data supports that of Davis et al.[8], who highlighted disparate recovery profiles that failed  
12  
13 6 to reach a resolution 7 months post-infection, thus highlighting the individual nature and the  
14  
15 7 need for tailored approaches[9]. The broad and complex symptom profile of Long COVID  
16  
17 8 makes it hard for health workers, family, and friends to fully understand the realities of living  
18  
19 9 with a debilitating and unpredictable condition[11]. Our data reaffirm this understanding by  
20  
21 10 demonstrating that multiple stakeholders are often involved in the Long COVID journey, which  
22  
23 11 is representative of the multidimensional and complex presentation of this condition. Boix et  
24  
25 12 al.[25] reported that many people with Long COVID have unfortunately struggled to have their  
26  
27 13 condition recognised. Patients have therefore felt isolated and resorted to self-treatment  
28  
29 14 methods given the lack of knowledge, understanding, and bespoke treatments available for  
30  
31 15 their condition and, in some instances, our data reaffirms the notion that this can deteriorate,  
32  
33 16 rather than ameliorate, their health[26, 27].

34  
35 17 Following critical illness, it can be commonplace to experience a range of difficult emotions  
36  
37 18 and periods of stress which can manifest in the form of feeling tearful, lack of appetite, and  
38  
39 19 difficulty sleeping[28]. Houben-Wilke and colleagues[29] demonstrate that negative emotions  
40  
41 20 (i.e., post-traumatic stress disorder, anxiety, and depression) persist in some Long COVID  
42  
43 21 patients 3 and 6 months after the onset of COVID-19 symptoms, with a prevalence comparable  
44  
45 22 between hospitalised and non-hospitalised patients. Our data indicates in non-hospitalised  
46  
47 23 participants that these emotions are frequently borne out of symptomology; however, the  
48  
49 24 diaries were able to reveal real-time, daily examples of how comparisons to healthy individuals  
50  
51 25 and pre-infection states are centred at the heart of these thought processes. Houben-Wilke et  
52  
53 26 al.[29] cited a lack of care and unmet needs as factors that contribute to negative emotions;  
54  
55 27 however, future support services must incorporate methods to support grief due to loss of  
56  
57 28 identity and purpose which is prominent amongst Long COVID patients. For example,  
58  
59 29 meaning development, art therapies, and journaling advanced by the Four Phase Model[30] are  
60  
30 proposed to be especially useful in grief management for ME/CFS patients. Further research is  
31  
32 needed to deepen the understanding and integration between physical, mental, and emotional  
support mechanisms.

1  
2  
3 1 Research surrounding the treatment and management of Long COVID is of international  
4 interest; however, there is limited evidence that repurposing existing clinical interventions has  
5 efficacy in addressing the unique and complex pathological mechanisms that underpin Long  
6 COVID. Therefore, bespoke, adaptive, flexible, interdisciplinary, and patient centred  
7 approaches are needed to support individuals with Long COVID[31-33]. This is in keeping  
8 with one of our main findings which was the broad and undulating symptom profile reported  
9 by participants. Macpherson et al.[34] suggest services to support patients could take the form  
10 of 'one-stop' clinics in hospitals to treat patients holistically alongside established  
11 multidisciplinary departments. However, the diaries enabled participants to reflect on some of  
12 the biggest challenges associated with support services, which mainly included time to access  
13 support alongside GP understanding of Long COVID. As such, if 'one-stop' clinics cannot  
14 support demand nor validate patient concerns, then patients may refer to potentially harmful  
15 self-treatment methods that will exacerbate symptoms. Therefore, whilst 'one-stop'  
16 multidisciplinary approaches offer a potential solution, the complex clinical presentation with  
17 patient settings may be better suited to a detailed and expansive service that is underpinned by  
18 a comprehensive screening process that directs patients to the required services which act in a  
19 'buffet style system' where patients can access (in both volume and intensity) services they  
20 require to positively influence clinical outcomes.

21  
22  
23  
24  
25  
26  
27  
28  
29  
30  
31  
32  
33  
34  
35  
36  
37  
38  
39  
40  
41  
42  
43  
44  
45  
46  
47  
48  
49  
50  
51  
52  
53  
54  
55  
56  
57  
58  
59  
60  
61  
62  
63  
64  
65  
66  
67  
68  
69  
70  
71  
72  
73  
74  
75  
76  
77  
78  
79  
80  
81  
82  
83  
84  
85  
86  
87  
88  
89  
90  
91  
92  
93  
94  
95  
96  
97  
98  
99  
100  
101  
102  
103  
104  
105  
106  
107  
108  
109  
110  
111  
112  
113  
114  
115  
116  
117  
118  
119  
120  
121  
122  
123  
124  
125  
126  
127  
128  
129  
130  
131  
132  
133  
134  
135  
136  
137  
138  
139  
140  
141  
142  
143  
144  
145  
146  
147  
148  
149  
150  
151  
152  
153  
154  
155  
156  
157  
158  
159  
160  
161  
162  
163  
164  
165  
166  
167  
168  
169  
170  
171  
172  
173  
174  
175  
176  
177  
178  
179  
180  
181  
182  
183  
184  
185  
186  
187  
188  
189  
190  
191  
192  
193  
194  
195  
196  
197  
198  
199  
200  
201  
202  
203  
204  
205  
206  
207  
208  
209  
210  
211  
212  
213  
214  
215  
216  
217  
218  
219  
220  
221  
222  
223  
224  
225  
226  
227  
228  
229  
230  
231  
232  
233  
234  
235  
236  
237  
238  
239  
240  
241  
242  
243  
244  
245  
246  
247  
248  
249  
250  
251  
252  
253  
254  
255  
256  
257  
258  
259  
260  
261  
262  
263  
264  
265  
266  
267  
268  
269  
270  
271  
272  
273  
274  
275  
276  
277  
278  
279  
280  
281  
282  
283  
284  
285  
286  
287  
288  
289  
290  
291  
292  
293  
294  
295  
296  
297  
298  
299  
300  
301  
302  
303  
304  
305  
306  
307  
308  
309  
310  
311  
312  
313  
314  
315  
316  
317  
318  
319  
320  
321  
322  
323  
324  
325  
326  
327  
328  
329  
330  
331  
332  
333  
334  
335  
336  
337  
338  
339  
340  
341  
342  
343  
344  
345  
346  
347  
348  
349  
350  
351  
352  
353  
354  
355  
356  
357  
358  
359  
360  
361  
362  
363  
364  
365  
366  
367  
368  
369  
370  
371  
372  
373  
374  
375  
376  
377  
378  
379  
380  
381  
382  
383  
384  
385  
386  
387  
388  
389  
390  
391  
392  
393  
394  
395  
396  
397  
398  
399  
400  
401  
402  
403  
404  
405  
406  
407  
408  
409  
410  
411  
412  
413  
414  
415  
416  
417  
418  
419  
420  
421  
422  
423  
424  
425  
426  
427  
428  
429  
430  
431  
432  
433  
434  
435  
436  
437  
438  
439  
440  
441  
442  
443  
444  
445  
446  
447  
448  
449  
450  
451  
452  
453  
454  
455  
456  
457  
458  
459  
460  
461  
462  
463  
464  
465  
466  
467  
468  
469  
470  
471  
472  
473  
474  
475  
476  
477  
478  
479  
480  
481  
482  
483  
484  
485  
486  
487  
488  
489  
490  
491  
492  
493  
494  
495  
496  
497  
498  
499  
500  
501  
502  
503  
504  
505  
506  
507  
508  
509  
510  
511  
512  
513  
514  
515  
516  
517  
518  
519  
520  
521  
522  
523  
524  
525  
526  
527  
528  
529  
530  
531  
532  
533  
534  
535  
536  
537  
538  
539  
540  
541  
542  
543  
544  
545  
546  
547  
548  
549  
550  
551  
552  
553  
554  
555  
556  
557  
558  
559  
560  
561  
562  
563  
564  
565  
566  
567  
568  
569  
570  
571  
572  
573  
574  
575  
576  
577  
578  
579  
580  
581  
582  
583  
584  
585  
586  
587  
588  
589  
590  
591  
592  
593  
594  
595  
596  
597  
598  
599  
600  
601  
602  
603  
604  
605  
606  
607  
608  
609  
610  
611  
612  
613  
614  
615  
616  
617  
618  
619  
620  
621  
622  
623  
624  
625  
626  
627  
628  
629  
630  
631  
632  
633  
634  
635  
636  
637  
638  
639  
640  
641  
642  
643  
644  
645  
646  
647  
648  
649  
650  
651  
652  
653  
654  
655  
656  
657  
658  
659  
660  
661  
662  
663  
664  
665  
666  
667  
668  
669  
670  
671  
672  
673  
674  
675  
676  
677  
678  
679  
680  
681  
682  
683  
684  
685  
686  
687  
688  
689  
690  
691  
692  
693  
694  
695  
696  
697  
698  
699  
700  
701  
702  
703  
704  
705  
706  
707  
708  
709  
710  
711  
712  
713  
714  
715  
716  
717  
718  
719  
720  
721  
722  
723  
724  
725  
726  
727  
728  
729  
730  
731  
732  
733  
734  
735  
736  
737  
738  
739  
740  
741  
742  
743  
744  
745  
746  
747  
748  
749  
750  
751  
752  
753  
754  
755  
756  
757  
758  
759  
760  
761  
762  
763  
764  
765  
766  
767  
768  
769  
770  
771  
772  
773  
774  
775  
776  
777  
778  
779  
780  
781  
782  
783  
784  
785  
786  
787  
788  
789  
790  
791  
792  
793  
794  
795  
796  
797  
798  
799  
800  
801  
802  
803  
804  
805  
806  
807  
808  
809  
810  
811  
812  
813  
814  
815  
816  
817  
818  
819  
820  
821  
822  
823  
824  
825  
826  
827  
828  
829  
830  
831  
832  
833  
834  
835  
836  
837  
838  
839  
840  
841  
842  
843  
844  
845  
846  
847  
848  
849  
850  
851  
852  
853  
854  
855  
856  
857  
858  
859  
860  
861  
862  
863  
864  
865  
866  
867  
868  
869  
870  
871  
872  
873  
874  
875  
876  
877  
878  
879  
880  
881  
882  
883  
884  
885  
886  
887  
888  
889  
890  
891  
892  
893  
894  
895  
896  
897  
898  
899  
900  
901  
902  
903  
904  
905  
906  
907  
908  
909  
910  
911  
912  
913  
914  
915  
916  
917  
918  
919  
920  
921  
922  
923  
924  
925  
926  
927  
928  
929  
930  
931  
932  
933  
934  
935  
936  
937  
938  
939  
940  
941  
942  
943  
944  
945  
946  
947  
948  
949  
950  
951  
952  
953  
954  
955  
956  
957  
958  
959  
960  
961  
962  
963  
964  
965  
966  
967  
968  
969  
970  
971  
972  
973  
974  
975  
976  
977  
978  
979  
980  
981  
982  
983  
984  
985  
986  
987  
988  
989  
990  
991  
992  
993  
994  
995  
996  
997  
998  
999  
1000

19 Multidisciplinary collaboration has been recommended as an approach for Long COVID  
20 support[3, 35], and recent NHS policy[36] has set out to drive multi-disciplinary team working  
21 for those living with chronic health conditions which has been effective in significantly  
22 improving cancer care[37]. However, given the nature of multidisciplinary teams (i.e., lack of  
23 interaction and unison between members), it is postulated that this would have limited patient  
24 benefit[3]. Alternatively, Tremblay et al.[38] found that cancer patients under the care of teams  
25 working with a greater interdisciplinary intensity reported four times greater access to care  
26 compared to lower intensity teams; access which our participants reported as a major difficulty.  
27 Furthermore, Veronese et al.[39] found improvements in surgery waiting times through  
28 interdisciplinary teamwork even when factoring in socioeconomic barriers in upper-middle  
29 income countries. Therefore, facilitating access through a 'buffet-style' approach in an  
30 interdisciplinary manner should ensure greater access to, and equity of, care.

31 Faghy and colleagues[3] suggest an interdisciplinary approach embedded in systems science  
32 may better help identify key stakeholders that can assist in the design, delivery and evaluation  
33 of support services. This will be vital given the prevalence of Long COVID[6] combined with

1 a chronically under-resourced and understaffed NHS[40]. A group of stakeholders that could  
2 ease a growing clinical burden is clinical exercise specialists whose expertise can design and  
3 deliver holistic support programmes that recognises the individual and broad symptom profile.  
4 These professionals can develop and implement holistic support mechanisms that are tailored  
5 to the individual and whose expertise is not limited to the prescription of physical activity and  
6 exercise[31, 33]. Furthermore, working in an interdisciplinary manner with a broad spectrum  
7 of other rehabilitation experts inclusive of physical, lifestyle, behavioural, and wellbeing  
8 practitioners would ensure other patient care needs are effectively supported. However, to be  
9 effective, it is important the lived experience is captured and incorporated into the entirety of  
10 the process to ensure the co-design and delivery of services address patient needs, are safe, and  
11 are accepted by Long COVID patients[41]. For example, it is widely acknowledged that key  
12 triggers (physical, cognitive, and emotional) can prompt post-exertional symptom exacerbation  
13 and/or relapse[8], which could explain why previous attempts to re-purpose existing clinical  
14 interventions for Long COVID services have not been accepted and in some cases have been  
15 damaging (i.e., the prescription of physical activity and graded exercise therapy)[42-44]. Early  
16 indications of the effectiveness of a personalised approach have been positive[45]; however,  
17 these lack the involvement of the patient experiences in the design and testing process and so  
18 also risk rejection if not suitable in the applied setting. Gorna et al.[12] propose that an approach  
19 involving an individualised physical assessment by physicians with medical expertise to  
20 identify organ and multisystem dysfunction is also needed. If this approach was combined with  
21 further work inclusive of diary methodology, which this study has identified as useful in  
22 providing real-world, personalised post-exertional symptom exacerbation experiences, then  
23 this could then inform individualised and wider rehabilitation/support plans that could also be  
24 inclusive of other key stakeholders (i.e., employers when employees are returning to work).  
25 However, broad representation must be a key consideration in future work to ensure robust  
26 advice is provided, and the inclusion of the lived experience of minority groups with Long  
27 COVID also needs to be better understood.

28 A limitation of COVID-19 research, inclusive of our work, is the lack of ethnic diversity, male  
29 representation, young people, low socioeconomic groups, and small sample sizes[8, 22, 34, 46-  
30 48]. Long COVID has a tendency to present more commonly in females than males[49];  
31 however, ethnic minorities have been disproportionately affected by the COVID-19  
32 pandemic[50-52]. A recent report by the National Institute for Health Research showed that  
33 the latter group constituted only 9% of cohorts in COVID-19 studies conducted in the UK. This

1 is despite ethnic minorities constituting 14% of the general population in the UK[53]. Current  
2 barriers to taking part in COVID-19 research have been postulated to include access to health  
3 services, language, and mistrust[46-48, 54, 55]. Gopal and colleagues[55] explain that existing  
4 equality and diversity recommendations to tackle these barriers (i.e., cultural competency  
5 training) have the potential to do more harm than good through ethnocentrism and stereotyping.  
6 Instead, they recommend that a Cultural Safety approach engrained within a deep medicine  
7 ideology would be most appropriate. By focusing on the individual experience of care, staff  
8 self-reflexivity, and structural reflexivity, Gopal et al.[55] postulate deep medicine would help  
9 overcome barriers such as mistrust and, subsequently, may help facilitate researcher-participant  
10 relationships in future research[56, 57]. Developing rapport by establishing and aligning with  
11 key principles valued by patients and reflecting with peers that challenge our own biases are  
12 just a couple of key examples of how future studies may look to develop trust and provide a  
13 safe, reassuring environment for ethnic minorities. This would be especially valuable in  
14 observational studies such as our own that require participant engagement over a prolonged  
15 period.

16 A merit of using diary methodology was how it enabled participants to reveal nuance  
17 experiences of their lives that, in the presence of a researcher, may not be easily recalled. For  
18 example, one participant reported crying as she did not have the energy to see her husband in  
19 hospital (Appendix A.) The emotional cost of reliving a new way of living at a predetermined  
20 moment in-person may have been substantial where other energy requirements such as travel,  
21 conversation, and sustained questioning may drain participant energy levels; unlike diary  
22 entries which could be completed at any time that was convenient to participants. However,  
23 quotes alike to this one lacked important detail which otherwise may have been explored with  
24 other research methodologies. For example, interviews would have been better suited to  
25 explore the source of self-treatment options.

## 26 **CONCLUSIONS**

27 This study has added to a growing body of literature in sharing the lived experience of Long  
28 COVID from the perspective of the patients. Over 16 weeks, our work recognised the broad,  
29 disabling, and episodic symptom profile of people living with Long COVID. It is vital more is  
30 done to support an already isolated group in a manner that not only provides validation to the  
31 Long COVID patient, but also a specific and adaptive support system that addresses the milieu  
32 of symptoms and undulating nature synonymous with Long COVID.



1 **Acknowledgements:** We would like to extend our sincere gratitude to our patients for their  
2 time, support, and development of our research on Long COVID.

3 **Competing interest:** No potential competing interest was reported by the authors.

4 **Funding:** This study was supported by an unrestricted investigator-sponsored research grant  
5 from Gilead Sciences (#IN-UK-983-6080).

6 **Contributorship Statement:** MAF and REA conceived the idea of the study. All partners (CT,  
7 MAF, RO, JY, FVF, TB, KH, & REA) were involved in recruitment and screening meanwhile  
8 CT, RO, and JY led data collection. CT led data analysis and the writing of the manuscript, and  
9 all authors contributed to the development of the submitted manuscript and approved this  
10 before submission.

11 **Data sharing statement:** Anonymised data can be made available on request.

12 **Ethics Approval Statement:** Ethical approval (IRAS ID: 292920) was granted by the Health  
13 Research Authority (HRA) and Health and Care Research Wales (HCRW).

## 14 REFERENCES

- 15 1. Collie, S., et al., *Effectiveness of BNT162b2 Vaccine against Omicron Variant in South Africa*.  
16 New England Journal of Medicine, 2022. **386**(5): p. 494-496.
- 17 2. England, P., *New data show vaccines reduce severe COVID-19 in older adults*. 2021.
- 18 3. Faghy, M.A.O., Rebecca. Thomas, Callum. Yates, James. Ferraro, Francesco V. Skipper, Lindsay.  
19 Barley McMullen, Sarah. Brown, Darren A. Arena, Ross. Ashton, Ruth EM. , *Is Long COVID the*  
20 *next global health crisis?* Journal of Global Health, 2022.
- 21 4. WHO. *A clinical case definition of post COVID-19 condition by a Delphi consensus, 6 October*  
22 *2021*. 2021 [22/07/2022]; Available from: [https://www.who.int/publications/i/item/WHO-](https://www.who.int/publications/i/item/WHO-2019-nCoV-Post-COVID-19-condition-Clinical-case-definition-2021.1)  
23 [2019-nCoV-Post COVID-19 condition-Clinical case definition-2021.1](https://www.who.int/publications/i/item/WHO-2019-nCoV-Post-COVID-19-condition-Clinical-case-definition-2021.1).
- 24 5. ONS. *Prevalence of ongoing symptoms following coronavirus (COVID-19) infection in the UK:*  
25 *7 July 2022*. 2022; Available from:  
26 [https://www.ons.gov.uk/peoplepopulationandcommunity/healthandsocialcare/conditionsa](https://www.ons.gov.uk/peoplepopulationandcommunity/healthandsocialcare/conditionsanddiseases/bulletins/prevalenceofongoingsymptomsfollowingcoronaviruscovid19infectionintheuk/7july2022)  
27 [nddiseases/bulletins/prevalenceofongoingsymptomsfollowingcoronaviruscovid19infectionin](https://www.ons.gov.uk/peoplepopulationandcommunity/healthandsocialcare/conditionsanddiseases/bulletins/prevalenceofongoingsymptomsfollowingcoronaviruscovid19infectionintheuk/7july2022)  
28 [theuk/7july2022](https://www.ons.gov.uk/peoplepopulationandcommunity/healthandsocialcare/conditionsanddiseases/bulletins/prevalenceofongoingsymptomsfollowingcoronaviruscovid19infectionintheuk/7july2022).
- 29 6. Wulf Hanson, S., et al., *A global systematic analysis of the occurrence, severity, and recovery*  
30 *pattern of long COVID in 2020 and 2021*. medRxiv, 2022.
- 31 7. Perego, E., et al., *Why the Patient-Made Term 'Long Covid' is needed*. Wellcome Open  
32 Research, 2020. **5**: p. 224.
- 33 8. Davis, H.E., et al., *Characterizing long COVID in an international cohort: 7 months of symptoms*  
34 *and their impact*. EClinicalMedicine, 2021. **38**: p. 101019.
- 35 9. Faghy, M.A., et al., *COVID-19 patients require multi-disciplinary rehabilitation approaches to*  
36 *address persisting symptom profiles and restore pre-COVID quality of life*. Expert Rev Respir  
37 Med, 2022. **16**(5): p. 595-600.
- 38 10. Hayes, L.D., J. Ingram, and N.F. Sculthorpe, *More Than 100 Persistent Symptoms of SARS-CoV-2*  
39 *(Long COVID): A Scoping Review*. Front Med (Lausanne), 2021. **8**: p. 750378.



1  
2  
3  
4  
5  
6  
7  
8  
9  
10  
11  
12  
13  
14  
15  
16  
17  
18  
19  
20  
21  
22  
23  
24  
25  
26  
27  
28  
29  
30  
31  
32  
33  
34  
35  
36  
37  
38  
39  
40  
41  
42  
43  
44  
45  
46  
47  
48  
49  
50  
51  
52  
53  
54  
55  
56  
57  
58  
59  
60

11. Brown, D.A. and K.K. O'Brien, *Conceptualising Long COVID as an episodic health condition*. *BMJ Glob Health*, 2021. **6**(9).
12. Gorna, R., et al., *Long COVID guidelines need to reflect lived experience*. *Lancet*, 2021. **397**(10273): p. 455-457.
13. Callan, C., et al., *'I can't cope with multiple inputs': a qualitative study of the lived experience of 'brain fog' after COVID-19*. *BMJ Open*, 2022. **12**(2): p. e056366.
14. Witvliet, M.G., *My 15-month rollercoaster ride with COVID-19: A social epidemiologist's perspective*. *Scand J Public Health*, 2022. **50**(1): p. 1-3.
15. Roulin, M.J., S. Hurst, and R. Spirig, *Diaries written for ICU patients*. *Qual Health Res*, 2007. **17**(7): p. 893-901.
16. Sansone, V., et al., *Narrative Diaries in Pediatrics: A Scoping Review*. *J Pediatr Nurs*, 2021. **59**: p. e93-e105.
17. Britton, C. and A. Moore, *Views from the Inside, Part 1: Routes to Diagnosis — Families' Experience of Living with a Child with Arthritis*. *British Journal of Occupational Therapy*, 2002. **65**(8): p. 374-380.
18. Fusch, P.I., & Ness, L. R. , *Are We There Yet? Data Saturation in Qualitative Research*. The qualitative report, 2015. **20**(9): p. 1408-1416.
19. Chaturvedi, R., et al., *COVID-19 complications in males and females: recent developments*. *J Comp Eff Res*, 2022. **11**(9): p. 689-698.
20. Aiyegbusi, O.L., et al., *Symptoms, complications and management of long COVID: a review*. *Journal of the Royal Society of Medicine*, 2021. **114**(9): p. 428-442.
21. Raveendran, A.V., R. Jayadevan, and S. Sashidharan, *Long COVID: An overview*. *Diabetes Metab Syndr*, 2021. **15**(3): p. 869-875.
22. Ladds, E., et al., *Persistent symptoms after Covid-19: qualitative study of 114 "long Covid" patients and draft quality principles for services*. *BMC Health Services Research*, 2020. **20**(1).
23. Burgoyne, R.W., et al., *Long-Term Quality-of-Life Outcomes Among Adults Living with HIV in the HAART Era: The Interplay of Changes in Clinical Factors and Symptom Profile*. *AIDS and Behavior*, 2004. **8**(2): p. 151-163.
24. Humphreys, H., et al., *Long COVID and the role of physical activity: a qualitative study*. *BMJ Open*, 2021. **11**(3): p. e047632.
25. Boix, V. and E. Merino, *Post-COVID syndrome. The never ending challenge*. *Med Clin (Engl Ed)*, 2022. **158**(4): p. 178-180.
26. Brown, K., et al., *Long COVID and self-management*. *Lancet*, 2022. **399**(10322): p. 355.
27. Davies, M., *Long covid patients travel abroad for expensive and experimental "blood washing"*. *BMJ*, 2022: p. o1671.
28. NHS. *Cognitive and emotional effects of recovering from COVID-19*. n.d 18/08/2022]; Available from: <https://www.cuh.nhs.uk/our-services/neuropsychology/guide-cognitive-and-emotional-effects-recovering-covid-19/>.
29. Houben-Wilke, S., et al., *The Impact of Long COVID-19 on Mental Health: Observational 6-Month Follow-Up Study*. *JMIR Mental Health*, 2022. **9**(2): p. e33704.
30. Fennell, P.A., N. Dorr, and S.S. George, *Elements of Suffering in Myalgic Encephalomyelitis/Chronic Fatigue Syndrome: The Experience of Loss, Grief, Stigma, and Trauma in the Severely and Very Severely Affected*. *Healthcare*, 2021. **9**(5): p. 553.
31. Ashton, R., et al., *COVID-19 and the long-term cardio-respiratory and metabolic health complications*. *Rev Cardiovasc Med*, 2022. **23**(2): p. 53.
32. Faghy, M.A., et al., *The need for exercise sciences and an integrated response to COVID-19: A position statement from the international HL-PIVOT network*. *Prog Cardiovasc Dis*, 2021. **67**: p. 2-10.
33. Faghy, M.A., et al., *Integrated sports and respiratory medicine in the aftermath of COVID-19*. *The Lancet Respiratory Medicine*, 2020. **8**(9): p. 852.

- 1  
2  
3 1 34. Macpherson, K., et al., *Experiences of living with long COVID and of accessing healthcare services: a qualitative systematic review*. BMJ Open, 2022. **12**(1): p. e050979.
- 4 2  
5 3 35. Mishra, V., et al., *Health Inequalities During COVID-19 and Their Effects on Morbidity and Mortality*. J Healthc Leadersh, 2021. **13**: p. 19-26.
- 6 4  
7 5 36. NHS. *NHS People Plan*. 2020 [cited 2023 13/02/2023]; Available from: <https://www.england.nhs.uk/our-nhs-people/>.
- 8 6  
9 7 37. Taberna, M., Moncayo, FG., Jané-Salas, E., Antonio, M., Arribas, L., Vilajosana, E., Torres, EP., & Mesía, R., *The Multidisciplinary Team (MDT) Approach and Quality of Care*. Frontiers in oncology, 2020. **10**(85).
- 10 8  
11 9 38. Tremblay, D., et al., *Effects of interdisciplinary teamwork on patient-reported experience of cancer care*. BMC Health Services Research, 2017. **17**(1).
- 12 10  
13 11 39. Veronese, E.T., P.M.A. Pomerantzeff, and F.B. Jatene, *Improving the heart team: An interdisciplinary team and integrated practice unit*. World Journal of Cardiology, 2021. **13**(12): p. 650-653.
- 14 12  
15 13 40. Oliver, D., *David Oliver: The NHS's understaffing is its Achilles' heel*. BMJ, 2017. **357**: p. j2192.
- 16 14  
17 15 41. Sivan, M., et al., *Long COVID Multidisciplinary consortium Optimising Treatments and services across the NHS (LOCOMOTION): protocol for a mixed-methods study in the UK*. BMJ open, 2022. **12**(5): p. e063505.
- 18 16  
19 17 42. D'Souza, A.F., *Long COVID: implications for physiotherapy*. European Journal of Physiotherapy, 2021. **23**(6): p. 384-384.
- 20 18  
21 19 43. Decary, S., et al., *Humility and Acceptance: Working Within Our Limits With Long COVID and Myalgic Encephalomyelitis/Chronic Fatigue Syndrome*. J Orthop Sports Phys Ther, 2021. **51**(5): p. 197-200.
- 22 20  
23 21 44. Vink, M. and A. Vink-Niese, *The Updated NICE Guidance Exposed the Serious Flaws in CBT and Graded Exercise Therapy Trials for ME/CFS*. Healthcare (Basel), 2022. **10**(5).
- 24 22  
25 23 45. Yong, S.J., *Long COVID or post-COVID-19 syndrome: putative pathophysiology, risk factors, and treatments*. Infectious Diseases, 2021. **53**(10): p. 737-754.
- 26 24  
27 25 46. Chastain, D.B., et al., *Racial Disproportionality in Covid Clinical Trials*. New England Journal of Medicine, 2020. **383**(9): p. e59.
- 28 26  
29 27 47. Etti, M., et al., *Ethnic minority and migrant underrepresentation in Covid-19 research: Causes and solutions*. EclinicalMedicine, 2021. **36**: p. 100903.
- 30 28  
31 29 48. Sirotych, E. and J.S. Hausmann, *Removing barriers and disparities in health: lessons from the COVID-19 pandemic*. Nature Reviews Rheumatology, 2021. **17**(3): p. 125-126.
- 32 30  
33 31 49. Sylvester, S.V., et al., *Sex differences in sequelae from COVID-19 infection and in long COVID syndrome: a review*. Curr Med Res Opin, 2022: p. 1-9.
- 34 32  
35 33 50. Jaljaa, A., et al., *Risk of SARS-CoV-2 infection in migrants and ethnic minorities compared with the general population in the European WHO region during the first year of the pandemic: a systematic review*. BMC Public Health, 2022. **22**(1).
- 36 34  
37 35 51. Kirby, T., *Evidence mounts on the disproportionate effect of COVID-19 on ethnic minorities*. The Lancet Respiratory Medicine, 2020. **8**(6): p. 547-548.
- 38 36  
39 37 52. Tai, D.B.G., et al., *Disproportionate Impact of COVID-19 on Racial and Ethnic Minority Groups in the United States: a 2021 Update*. Journal of Racial and Ethnic Health Disparities, 2021.
- 40 38  
41 39 53. NIHR. *NIHR research ethnicity data provides insight on participation in COVID-19 studies [Internet]*. . 2020 04/06/2022]; Available from: <https://www.nihr.ac.uk/news/nihr-research-ethnicity-data-provides-insight-on-participation-in-covid-19-studies/26460>.
- 42 40  
43 41 54. Enria, L., et al., *Power, fairness and trust: understanding and engaging with vaccine trial participants and communities in the setting up the EBOVAC-Salone vaccine trial in Sierra Leone*. BMC Public Health, 2016. **16**(1).
- 44 42  
45 43 55. Gopal, D.P., et al., *Reflexivity, Cultural Safety, and improving the health of racially minoritised communities*. The Lancet, 2022. **399**(10335): p. 1581-1582.
- 46 44  
47 45  
48 46  
49 47  
50 48  
51 49  
52 50  
53 51  
54 52  
55 53  
56 54  
57 55  
58 56  
59 57  
60 58

1  
2  
3  
4  
5  
6  
7  
8  
9  
10  
11  
12  
13  
14  
15  
16  
17  
18  
19  
20  
21  
22  
23  
24  
25  
26  
27  
28  
29  
30  
31  
32  
33  
34  
35  
36  
37  
38  
39  
40  
41  
42  
43  
44  
45  
46  
47  
48  
49  
50  
51  
52  
53  
54  
55  
56  
57  
58  
59  
60

1 56. Diallo, B.A., et al., *Clinical research on COVID-19: perceptions and barriers to participation in*  
2 *The Gambia*. *BMJ Global Health*, 2022. **7**(2): p. e007533.  
3 57. Schmotzer, G.L., *Barriers and facilitators to participation of minorities in clinical trials*.  
4 *Ethnicity & Disease*, 2012. **22**(2): p. 226-30.  
5

For peer review only

1  
2  
3 **1 APPENDICES**  
4

5 **2 Appendix A – Theme 1 additional quotes:**  
6

7 3 *“Struggled to get up/ fatigue. Short of breath. Tinnitus horrendous every day. sore throat.*

8 4 *Cannot sleep. Lymph nodes swollen Clavicle/ underarm. Aching like I have the flu.”*  
9

10  
11 5 *“Feeling exhausted had a steady day out with my hubby and he did all of the driving.”*  
12

13  
14 6 *“Felt really drained and lacking energy again. Slept for a short time at lunchtime. Cried*  
15 *because I was so tired, I didn't have the energy to drive to hospital to visit husband. Got son*  
16 *to take me.”*  
17 8

18  
19  
20 9 *“Sunday funday. Cinema with son. It was the best day of his life. Mean so very much to hear*  
21 *and see him enjoy himself. Had to be up early to get there so slept in car on way home in*  
22 *traffic.”*  
23 11  
24  
25  
26  
27  
28  
29  
30  
31  
32  
33  
34  
35  
36  
37  
38  
39  
40  
41  
42  
43  
44  
45  
46  
47  
48  
49  
50  
51  
52  
53  
54  
55  
56  
57  
58  
59  
60

## ID bmjopen-2020-041038 SRQR Checklist

|                                                    | Item                                                                                                                                                                                                                                                                                                                                                                                                 | Page         |
|----------------------------------------------------|------------------------------------------------------------------------------------------------------------------------------------------------------------------------------------------------------------------------------------------------------------------------------------------------------------------------------------------------------------------------------------------------------|--------------|
| <b>Title</b>                                       | Item 1. Title: Concise description of the nature and topic of the study. Identifying the study as qualitative or indicating the approach (e.g., ethnography, grounded theory) or data collection methods (e.g., interview, focus group) is recommended.                                                                                                                                              | page 1       |
| <b>Abstract</b>                                    | Item 2. Abstract: Summary of key elements of the study using the abstract format of the intended publication; typically includes background, purpose, methods, results, and conclusions.                                                                                                                                                                                                             | page 2       |
| <b>Problem Formulation</b>                         | Item 3. Problem Formulation: Description and significance of the problem/phenomenon studied; review of relevant theory and empirical work; problem statement.                                                                                                                                                                                                                                        | pages 3-4    |
| <b>Purpose or research question</b>                | Item 4. Purpose or research question: Purpose of the study and specific objectives or questions.                                                                                                                                                                                                                                                                                                     | page 4       |
|                                                    | Item 5. Qualitative approach and research paradigm: Qualitative approach (e.g., ethnography, grounded theory, case study, phenomenology, narrative research) and guiding theory if appropriate; identifying the research paradigm (e.g., post-positivist, constructivist/interpretivist) is also recommended; rationale                                                                              | pages 2 & 6  |
|                                                    | Item 6. Researcher characteristics and reflexivity: Researchers' characteristics that may influence the research, including personal attributes, qualifications/experience, relationship with participants, assumptions, and/or presuppositions; potential or actual interaction between researchers' characteristics and the research questions, approach, methods, results and/or transferability. | Pages 5 & 6. |
| <b>Context</b>                                     | Item 7. Context: Setting/site and salient contextual factors; rationale.                                                                                                                                                                                                                                                                                                                             | pages 2 & 5  |
| <b>Sampling strategy</b>                           | Item 8. Sampling strategy: How and why research participants, documents, or events were selected; criteria for deciding when no further sampling was necessary (e.g., sampling saturation); rationale.                                                                                                                                                                                               | page 5       |
| <b>Ethical issues pertaining to human subjects</b> | Item 9. Ethical issues pertaining to human subjects: Documentation of approval by an appropriate ethics review board and participant consent, or explanation for lack thereof; other confidentiality and data security issues.                                                                                                                                                                       | page 5       |

|                                                     |                                                                                                                                                                                                                                                                                                                                                                                                               |                  |
|-----------------------------------------------------|---------------------------------------------------------------------------------------------------------------------------------------------------------------------------------------------------------------------------------------------------------------------------------------------------------------------------------------------------------------------------------------------------------------|------------------|
|                                                     | Item 10. Data collection methods: Types of data collected; details of data collection procedures including (as appropriate) start and stop dates of data collection and analysis, iterative process, triangulation of sources/methods, and modification of procedures in response to evolving study findings; rationale.                                                                                      | page 5           |
| <b>Data collection instruments and technologies</b> | Item 11. Data collection instruments and technologies: Description of instruments (e.g., interview guides, questionnaires) and devices (e.g., audio recorders) used for data collection; if/how the instrument(s) changed over the course of the study.                                                                                                                                                       | page 5           |
| <b>Units of study</b>                               | Item 12. Units of study: Number and relevant characteristics of participants, documents, or events included in the study; level of participation.                                                                                                                                                                                                                                                             | pages 5, 6 & 7.  |
| <b>Data processing</b>                              | Item 13. Data processing: Methods for processing data prior to and during analysis, including transcription, data entry, data management and security, verification of data integrity, data coding and anonymization / de-identification of excerpts.                                                                                                                                                         | pages 5 & 6.     |
| <b>Data analysis</b>                                | Item 14. Data analysis: Process by which inferences, themes, etc. were identified and developed, including the researchers involved in data analysis; usually references a specific paradigm or approach; rationale.                                                                                                                                                                                          | page 6           |
| <b>Techniques to enhance trustworthiness</b>        | Item 15. Techniques to enhance trustworthiness: Techniques to enhance trustworthiness and credibility of data analysis,(e.g., member checking, triangulation, audit trail); rationale                                                                                                                                                                                                                         | page 6           |
| <b>Synthesis and interpretation</b>                 | Item 16. Synthesis and interpretation: Main findings (e.g., interpretations, inferences, and themes); might include development of a theory or model, or integration with prior research or theory.                                                                                                                                                                                                           | pages 2, 6 & 14. |
| <b>Links to empirical data</b>                      | Item 17. Links to empirical data: Evidence (e.g., quotes, field notes, text excerpts, photographs) to substantiate analytic findings.                                                                                                                                                                                                                                                                         | pages 7 – 14.    |
|                                                     | Item 18. Integration with prior work, implications, transferability, and contribution(s) to the field: Short summary of main findings, explanation of how findings and conclusions connect to, support, elaborate on, or challenge conclusions of earlier scholarship; discussion of scope of application/generalizability; identification of unique contribution(s) to scholarship in a discipline or field. | pages 14 -18.    |

|                              |                                                                                                                                                 |               |
|------------------------------|-------------------------------------------------------------------------------------------------------------------------------------------------|---------------|
| <b>Limitations</b>           | Item 19. Limitations: Trustworthiness and limitations of findings                                                                               | Pages 3 & 18. |
| <b>Conflicts of interest</b> | Item 20. Conflicts of interest: Potential sources of influence or perceived influence on study conduct and conclusions; how these were managed. | page 19.      |
| <b>Funding</b>               | Item 21. Funding: Sources of funding and other support; role of funders in data collection, interpretation, and reporting.                      | page 19.      |

For peer review only
