# Supplementary material for: Lived experience of patients with Long COVID: a qualitative study in the UK
Source: PubMed Central journal article supplement — BMJ Open. 2023 Apr 26;13(4):e068481. doi: 10.1136/bmjopen-2022-068481 (PMC10151237; doi:10.1136/bmjopen-2022-068481), 2023-04-26
Supplement: bmjopen-2022-068481supp001.pdf [file bmjopen-2022-068481supp001.pdf]

1 **APPENDICES**

2 **Apendix A – Theme 1 additional quotes:**

3 *“Struggled to get up/ fatigue. Short of breath. Tinnitus horrendous every day. sore throat.*  
4 *Cannot sleep. Lymph nodes swollen Clavicle/ underarm. Aching like I have the flu.”*

5 *“Feeling exhausted had a steady day out with my hubby and he did all of the driving.”*

6 *“Felt really drained and lacking energy again. Slept for a short time at lunchtime. Cried*  
7 *because I was so tired, I didn't have the energy to drive to hospital to visit husband. Got son*  
8 *to take me.”*

9 *“Sunday funday. Cinema with son. It was the best day of his life. Mean so very much to hear*  
10 *and see him enjoy himself. Had to be up early to get there so slept in car on way home in*  
11 *traffic.”*
